# Supplementary material
Source: publisher figshare collection journal article supplement (https://geolsoc.figshare.com/articles/dataset/_/3454010)

Residual Geoid anomaly (between  $n \geq 8$  and  $n \geq 9$ )

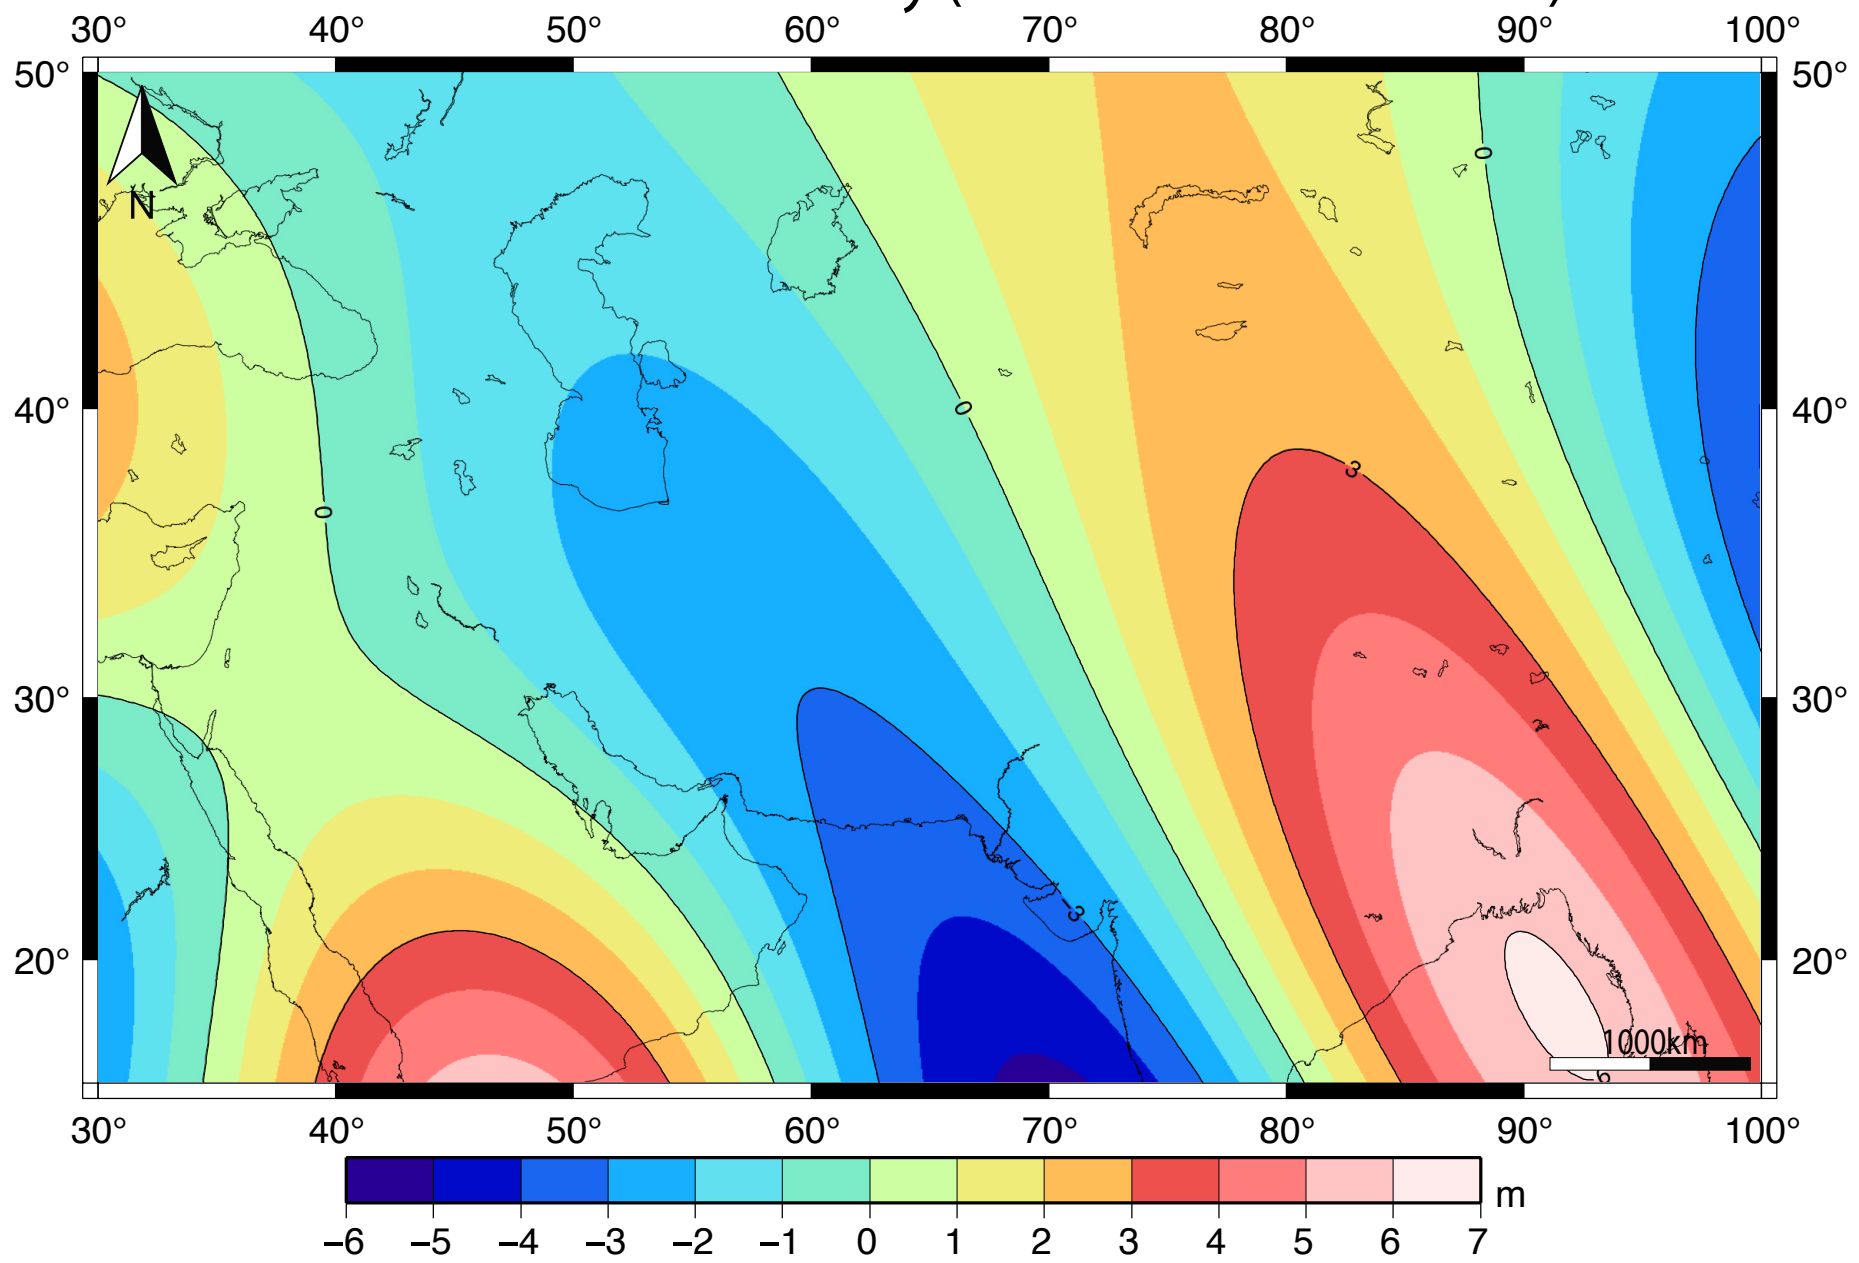

Residual Geoid anomaly (between  $n \geq 9$  and  $n \geq 10$ )

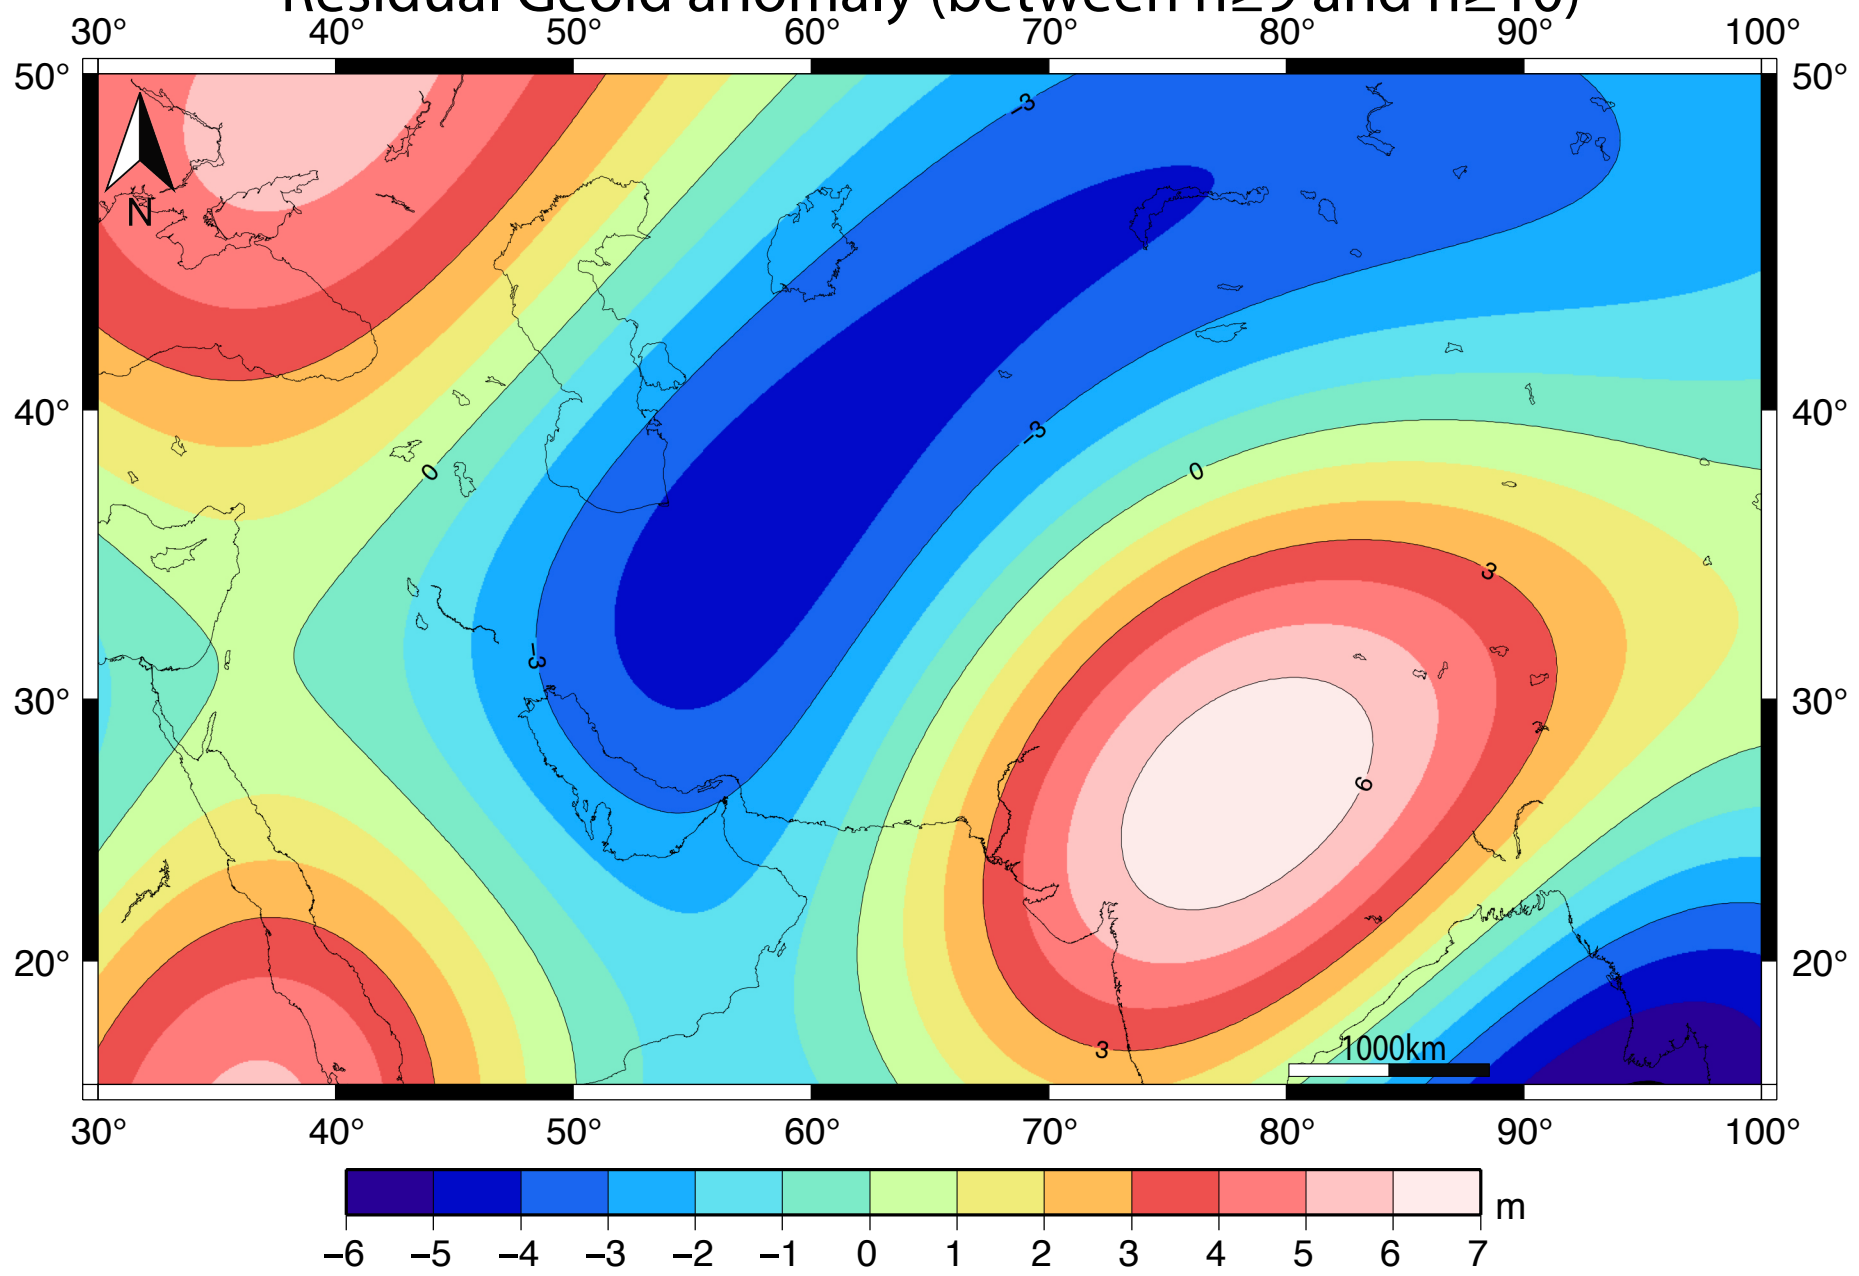

Residual Geoid anomaly (between  $n \geq 10$  and  $n \geq 11$ )

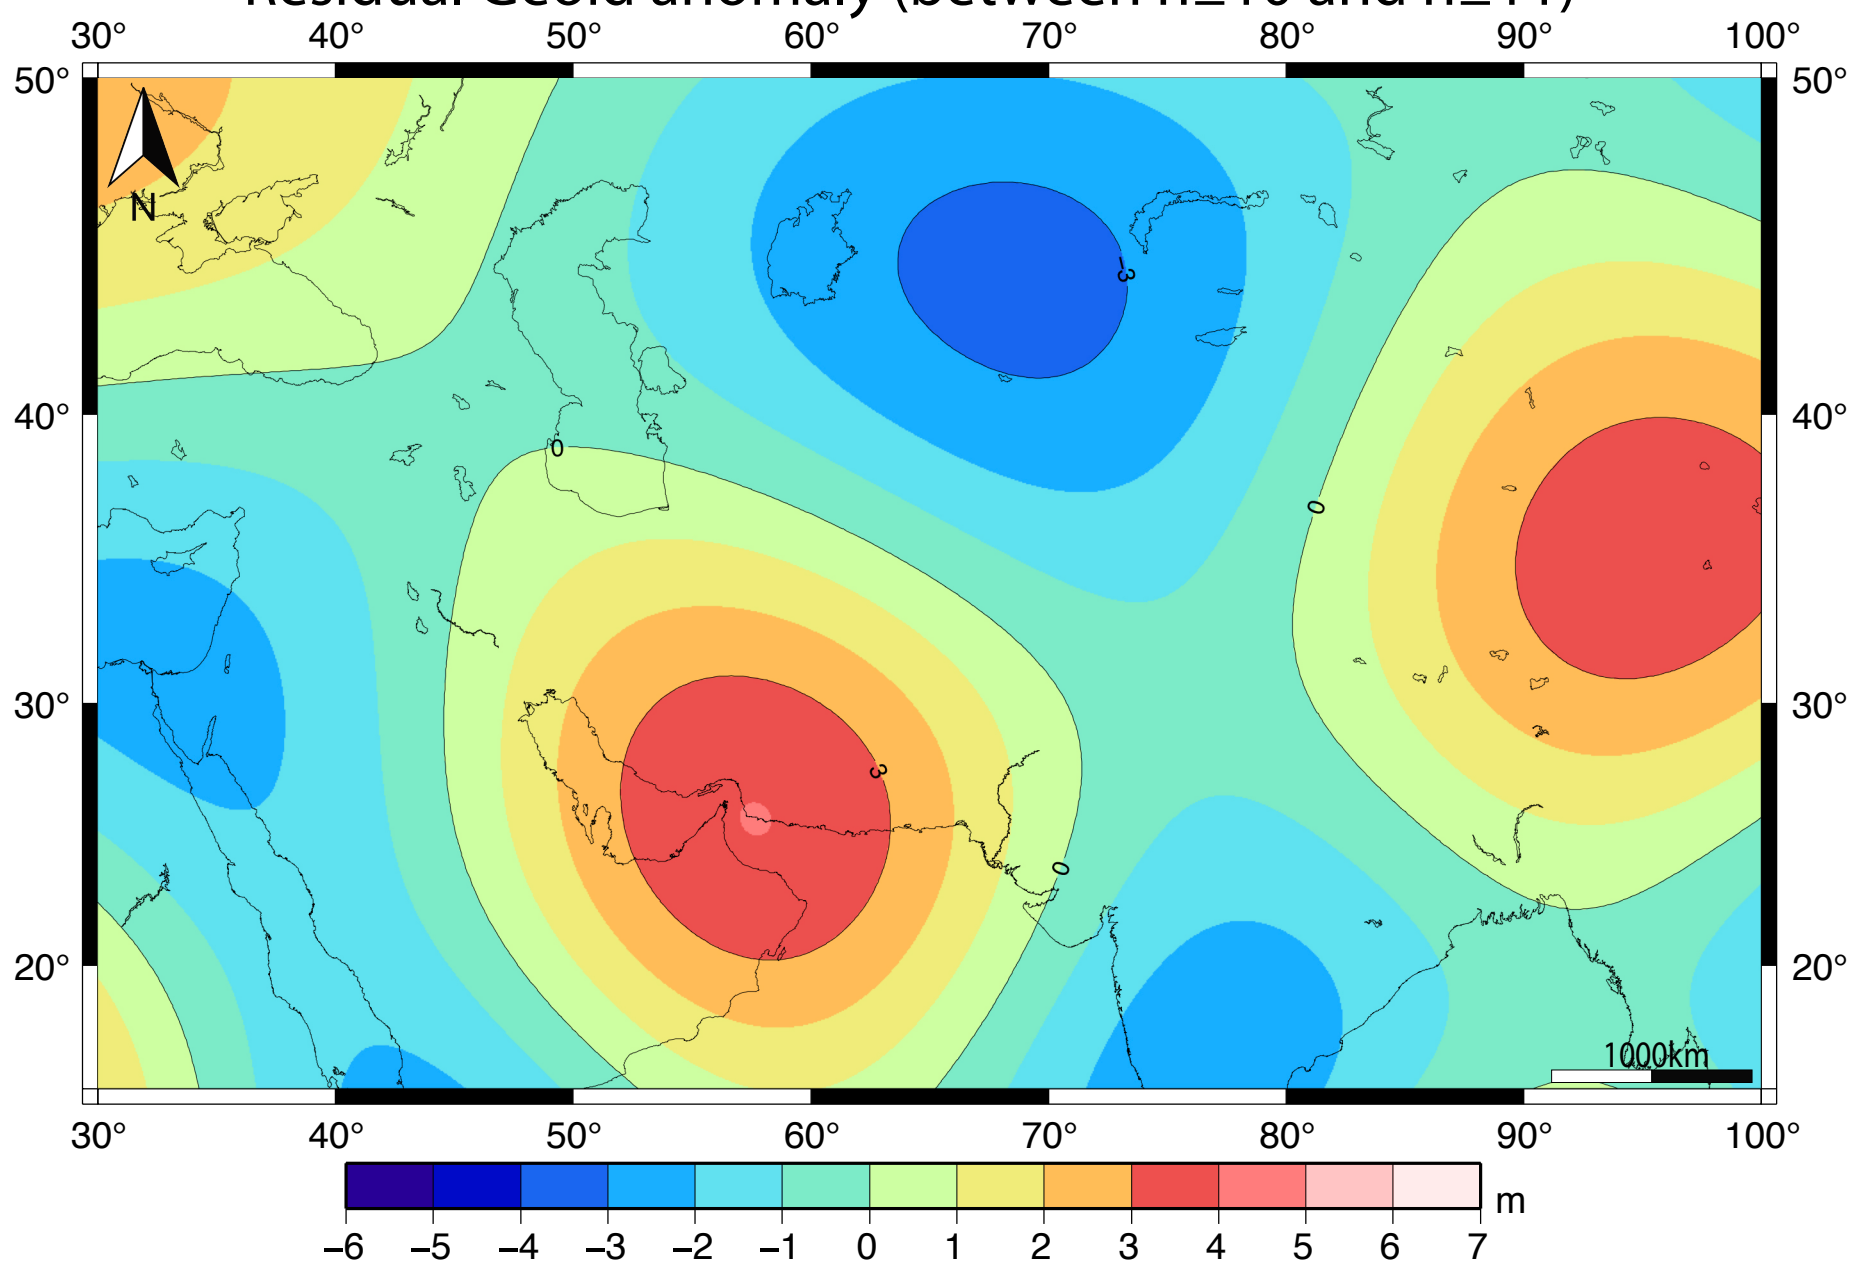

Supplement: Supplementary file 1 [file 1]
