# Supplementary material
Source: publisher figshare collection journal article supplement (https://geolsoc.figshare.com/articles/dataset/_/3454010)
Supplement: Supplementary file 2 [file 1]

| Station | Lon.   | Lat.   | Elev. | Crust | Reference(s)             | Data    | Project / Experiment   |
|---------|--------|--------|-------|-------|--------------------------|---------|------------------------|
| FRSS    | 42,110 | 16,740 | 1     | 14    | Al-Damegh et al., 2005   | RF      | Permanent Stations     |
| YNBS    | 37,990 | 24,340 | 125   | 32    | Al-Damegh et al., 2005   | RF      | Permanent Stations     |
| LTHS    | 40,410 | 20,270 | 125   | 22    | Al-Damegh et al., 2005   | RF      | Permanent Stations     |
| HASS    | 49,690 | 25,190 | 152   | 41    | Al-Damegh et al., 2005   | RF      | Permanent Stations     |
| AYUS    | 35,270 | 28,190 | 201   | 28    | Al-Damegh et al., 2005   | RF      | Permanent Stations     |
| HAQS    | 34,930 | 29,050 | 375   | 27    | Al-Damegh et al., 2005   | RF      | Permanent Stations     |
| BDAS    | 35,100 | 28,430 | 398   | 27    | Al-Damegh et al., 2005   | RF      | Permanent Stations     |
| TAYS    | 34,870 | 28,550 | 433   | 29    | Al-Damegh et al., 2005   | RF      | Permanent Stations     |
| QURS    | 37,320 | 31,390 | 503   | 33    | Al-Damegh et al., 2005   | RF      | Permanent Stations     |
| ARSS    | 43,240 | 25,880 | 682   | 40    | Al-Damegh et al., 2005   | RF      | Permanent Stations     |
| ALWS    | 35,070 | 29,310 | 684   | 25    | Al-Damegh et al., 2005   | RF      | Permanent Stations     |
| KBRs    | 39,260 | 25,790 | 723   | 36    | Al-Damegh et al., 2005   | RF      | Permanent Stations     |
| RUIJW   | 38,400 | 32,480 | 739   | 38    | Al-Damegh et al., 2005   | RF      | Permanent Stations     |
| TBKS    | 36,550 | 28,220 | 823   | 35    | Al-Damegh et al., 2005   | RF      | Permanent Stations     |
| JMQS    | 35,880 | 28,890 | 941   | 38    | Al-Damegh et al., 2005   | RF      | Permanent Stations     |
| JMOS    | 35,110 | 29,170 | 995   | 30    | Al-Damegh et al., 2005   | RF      | Permanent Stations     |
| HILS    | 41,790 | 27,380 | 1027  | 38    | Al-Damegh et al., 2005   | RF      | Permanent Stations     |
| TATS    | 43,480 | 19,540 | 1190  | 41    | Al-Damegh et al., 2005   | RF      | Permanent Stations     |
| HITJ    | 35,840 | 29,740 | 1205  | 38    | Al-Damegh et al., 2005   | RF      | Permanent Stations     |
| BLJS    | 41,600 | 19,880 | 2041  | 40    | Al-Damegh et al., 2005   | RF      | Permanent Stations     |
| DJNS    | 43,540 | 17,710 | 2161  | 46    | Al-Damegh et al., 2005   | RF      | Permanent Stations     |
| NAMS    | 42,210 | 19,170 | 2198  | 44    | Al-Damegh et al., 2005   | RF      | Permanent Stations     |
| KTOM    | 57,690 | 23,480 | 149   | 41    | Al-Lazki, 2003           | RF      | Permanent Stations     |
| JBRN    | 57,260 | 22,910 | 554   | 44    | Al-Lazki, 2003           | RF      | Permanent Stations     |
| AWBI    | 57,530 | 23,300 | 632   | 50    | Al-Lazki, 2003           | RF      | Permanent Stations     |
|         | 41,500 | 37,000 | 415   | 42    | Angus et al., 2006       | RF      | ETSE Array             |
|         | 40,750 | 37,000 | 432   | 42    | Angus et al., 2006       | RF      | ETSE Array             |
|         | 41,500 | 38,000 | 653   | 41    | Angus et al., 2006       | RF      | ETSE Array             |
|         | 40,500 | 38,000 | 697   | 41    | Angus et al., 2006       | RF      | ETSE Array             |
|         | 39,000 | 38,000 | 778   | 38    | Angus et al., 2006       | RF      | ETSE Array             |
|         | 38,750 | 39,000 | 799   | 36    | Angus et al., 2006       | RF      | ETSE Array             |
|         | 39,500 | 39,000 | 929   | 41    | Angus et al., 2006       | RF      | ETSE Array             |
|         | 38,500 | 39,000 | 1153  | 27    | Angus et al., 2006       | RF      | ETSE Array             |
|         | 38,500 | 38,000 | 1190  | 32    | Angus et al., 2006       | RF      | ETSE Array             |
|         | 42,500 | 39,000 | 1750  | 48    | Angus et al., 2006       | RF      | ETSE Array             |
|         | 39,500 | 40,000 | 1781  | 42    | Angus et al., 2006       | RF      | ETSE Array             |
|         | 42,500 | 38,000 | 1849  | 41    | Angus et al., 2006       | RF      | ETSE Array             |
|         | 43,500 | 39,000 | 1860  | 44    | Angus et al., 2006       | RF      | ETSE Array             |
|         | 41,500 | 40,000 | 1944  | 52    | Angus et al., 2006       | RF      | ETSE Array             |
|         | 38,000 | 40,000 | 1978  | 38    | Angus et al., 2006       | RF      | ETSE Array             |
|         | 43,500 | 40,000 | 2001  | 40    | Angus et al., 2006       | RF      | ETSE Array             |
|         | 41,000 | 39,000 | 2117  | 50    | Angus et al., 2006       | RF      | ETSE Array             |
|         | 40,250 | 40,000 | 2268  | 43    | Angus et al., 2006       | RF      | ETSE Array             |
|         | 45,000 | 40,000 | 2287  | 46    | Angus et al., 2006       | RF      | ETSE Array             |
| BAF     | 55,567 | 31,590 | 1219  | 46    | Asfari et al., 2011      | RF      | Permanent Stations     |
| VIS     | 46,850 | 34,526 | 1374  | 50    | Asfari et al., 2011      | RF      | Permanent Stations     |
| GAR     | 52,042 | 32,404 | 1570  | 61    | Asfari et al., 2011      | RF      | Permanent Stations     |
| RAM     | 52,382 | 31,809 | 1605  | 52    | Asfari et al., 2011      | RF      | Permanent Stations     |
| KOM     | 47,510 | 34,175 | 1648  | 39    | Asfari et al., 2011      | RF      | Permanent Stations     |
| GHG     | 46,569 | 34,329 | 1704  | 47    | Asfari et al., 2011      | RF      | Permanent Stations     |
| LIN     | 46,962 | 34,919 | 1747  | 38    | Asfari et al., 2011      | RF      | Permanent Stations     |
| DHR     | 46,387 | 34,700 | 1785  | 39    | Asfari et al., 2011      | RF      | Permanent Stations     |
| CHK     | 54,407 | 32,244 | 1844  | 38    | Asfari et al., 2011      | RF      | Permanent Stations     |
| KLH     | 51,579 | 33,319 | 2323  | 41    | Asfari et al., 2011      | RF      | Permanent Stations     |
| ZEF     | 52,329 | 32,896 | 2404  | 56    | Asfari et al., 2011      | RF      | Permanent Stations     |
| PIR     | 50,892 | 32,684 | 2468  | 45    | Asfari et al., 2011      | RF      | Permanent Stations     |
| shot3   | 44,319 | 22,001 | 979   | 39    | Badri, 1991              | seismic |                        |
| shot1   | 45,785 | 24,495 | 708   | 43    | Badri, 1991              | seismic |                        |
| d0      | 60,012 | 20,276 | -3459 | 27    | Barton et al., 1990      | seismic |                        |
| d50     | 59,482 | 20,709 | -2212 | 28    | Barton et al., 1990      | seismic |                        |
| d150    | 60,296 | 20,227 | -3433 | 9     | Barton et al., 1990      | seismic |                        |
| d200    | 60,699 | 19,985 | -3500 | 8     | Barton et al., 1990      | seismic |                        |
| d100    | 59,890 | 20,468 | -2288 | 16    | Barton et al., 1990      | seismic |                        |
| WHAD    | 37,552 | 35,917 | 441   | 30    | Brew, 2001               | RF      | SNSN                   |
| HAWK    | 36,405 | 34,520 | 703   | 30    | Brew, 2001               | RF      | SNSN                   |
| RABH    | 37,206 | 34,436 | 800   | 44    | Brew, 2001               | RF      | SNSN                   |
| MARH    | 36,482 | 34,026 | 2380  | 41    | Brew, 2001               | RF      | SNSN                   |
| USP     | 74,490 | 43,270 | 670   | 42    | Bump and Sheehan, 1998   | RF      |                        |
| CHM     | 74,750 | 42,990 | 677   | 37    | Bump and Sheehan, 1998   | RF      |                        |
| TKM     | 75,310 | 42,860 | 873   | 44    | Bump and Sheehan, 1998   | RF      |                        |
| EKS     | 73,780 | 42,660 | 1112  | 45    | Bump and Sheehan, 1998   | RF      |                        |
| AAK     | 74,490 | 42,630 | 1738  | 51    | Bump and Sheehan, 1998   | RF      |                        |
| AML     | 73,690 | 42,080 | 3092  | 60    | Bump and Sheehan, 1998   | RF      |                        |
| TBZ     | 39,776 | 40,994 | -5    | 36    | Çagir et al., 1999       | RF      | Permanent Stations     |
| WMQ     | 87,695 | 43,821 | 840   | 46    | Chen et al., 2010        | RF      | CNDSN                  |
| AXX     | 95,800 | 40,514 | 1149  | 50    | Chen et al., 2010        | RF      | CNDSN                  |
| KSH     | 75,973 | 39,517 | 1386  | 62    | Chen et al., 2010        | RF      | CNDSN                  |
| HTA     | 79,917 | 37,067 | 1387  | 53    | Chen et al., 2010        | RF      | CNDSN                  |
| GTA     | 99,814 | 39,411 | 1394  | 52    | Chen et al., 2010        | RF      | CNDSN                  |
| WUS     | 79,218 | 41,199 | 1404  | 50    | Chen et al., 2010        | RF      | CNDSN                  |
| GOM     | 94,873 | 36,432 | 2777  | 68    | Chen et al., 2010        | RF      | CNDSN                  |
| HTG     | 90,760 | 37,860 | 3059  | 42    | Chen et al., 2010        | RF      | CNDSN                  |
| LSA     | 91,150 | 29,700 | 4075  | 84    | Chen et al., 2010        | RF      | CNDSN                  |
| SQH     | 80,080 | 32,500 | 4398  | 75    | Chen et al., 2010        | RF      | CNDSN                  |
| CAD     | 97,500 | 31,000 | 4437  | 76    | Chen et al., 2010        | RF      | CNDSN                  |
| IR1     | 51,024 | 35,476 | 1088  | 47    | Doloei and Roberts, 2003 | RF      | Iran Long-Period Array |
| IR7     | 50,609 | 35,703 | 1136  | 44    | Doloei and Roberts, 2003 | RF      | Iran Long-Period Array |
| IR2     | 50,898 | 35,663 | 1172  | 48    | Doloei and Roberts, 2003 | RF      | Iran Long-Period Array |
| IR4     | 50,901 | 35,239 | 1270  | 44    | Doloei and Roberts, 2003 | RF      | Iran Long-Period Array |
| IR5     | 50,581 | 35,213 | 1289  | 43    | Doloei and Roberts, 2003 | RF      | Iran Long-Period Array |
| IR1     | 50,689 | 35,416 | 1343  | 48    | Doloei and Roberts, 2003 | RF      | Iran Long-Period Array |
| IR6     | 50,426 | 35,474 | 1842  | 52    | Doloei and Roberts, 2003 | RF      | Iran Long-Period Array |
| shot1   | 95,559 | 33,776 | 4439  | 76    | Galvé et al., 2002       | seismic |                        |
| shot2   | 97,340 | 32,737 | 4056  | 76    | Galvé et al., 2002       | seismic |                        |
| shot3   | 97,983 | 34,167 | 4614  | 77    | Galvé et al., 2002       | seismic |                        |
| shot5   | 98,232 | 35,949 | 4446  | 68    | Galvé et al., 2002       | seismic |                        |
| shot6   | 99,489 | 37,058 | 3308  | 65    | Galvé et al., 2002       | seismic |                        |
| shot4   | 99,104 | 35,032 | 4316  | 72    | Galvé et al., 2002       | seismic |                        |
| 1       | 88,445 | 31,662 | 4699  | 81    | Gao et al., 2013         | seismic | SINOPROBE              |
| 2       | 88,617 | 32,121 | 4623  | 74    | Gao et al., 2013         | seismic | SINOPROBE              |
| 3       | 88,510 | 32,642 | 4978  | 70    | Gao et al., 2013         | seismic | SINOPROBE              |
| 4       | 88,532 | 34,658 | 4839  | 73    | Gao et al., 2013         | seismic | SINOPROBE              |
| 5       | 88,466 | 33,977 | 5115  | 71    | Gao et al., 2013         | seismic | SINOPROBE              |
| 6       | 88,275 | 33,138 | 4817  | 74    | Gao et al., 2013         | seismic | SINOPROBE              |
| 7       | 88,490 | 33,835 | 5147  | 72    | Gao et al., 2013         | seismic | SINOPROBE              |
| BHD     | 44,380 | 33,270 | 32    | 43    | Gök et al., 2008         | RF      | Permanent Stations     |
| KBD     | 47,693 | 29,176 | 101   | 45    | Gök et al., 2008         | RF      | Permanent Stations     |
| MSL     | 43,110 | 36,400 | 258   | 39    | Gök et al., 2008         | RF      | Permanent Stations     |
| QURS    | 37,324 | 31,386 | 506   | 32    | Gök et al., 2008         | RF      | Permanent Stations     |
| RTB     | 40,308 | 33,030 | 617   | 35    | Gök et al., 2008         | RF      | Permanent Stations     |
| RUW     | 38,178 | 32,539 | 683   | 37    | Gök et al., 2008         | RF      | Permanent Stations     |
| MRDN    | 40,700 | 37,290 | 835   | 38    | Gök et al., 2008         | RF      | Permanent Stations     |
| HILS    | 41,792 | 27,384 | 1027  | 37    | Gök et al., 2008         | RF      | Permanent Stations     |
| URFA    | 38,821 | 37,441 | 826   | 35    | Gök et al., 2011         | RF      | Caucasus               |
| MALT    | 38,427 | 38,313 | 958   | 41    | Gök et al., 2011         | RF      | Caucasus               |
| AKHA    | 43,400 | 41,450 | 1604  | 50    | Gök et al., 2011         | RF      | Caucasus               |
| AGRB    | 42,992 | 39,576 | 1728  | 42    | Gök et al., 2011         | RF      | Caucasus               |
| KARS    | 43,079 | 40,628 | 1768  | 49    | Gök et al., 2011         | RF      | Caucasus               |
| SVRC    | 39,306 | 38,378 | 1996  | 42    | Gök et al., 2011         | RF      | Caucasus               |
| KEKZ    | 44,100 | 35,900 | 381   | 45    | Gritto et al., 2008      | RF      |                        |
| KSBB    | 45,700 | 35,100 | 579   | 49    | Gritto et al., 2008      | RF      |                        |
| KSJS    | 45,400 | 35,500 | 727   | 49    | Gritto et al., 2008      | RF      |                        |
| KDDA    | 42,800 | 37,200 | 819   | 52    | Gritto et al., 2008      | RF      |                        |
| KESM    | 44,200 | 36,900 | 982   | 39    | Gritto et al., 2008      | RF      |                        |
| KSWW    | 45,300 | 36,100 | 1570  | 54    | Gritto et al., 2008      | RF      |                        |

| Station | Lon.    | Lat.    | Elev. | Crust | Reference(s)      | Data | Project / Experiment |
|---------|---------|---------|-------|-------|-------------------|------|----------------------|
| b1      | 52.56   | 29.86   | 1592  | 46    | Paul et al., 2006 | RF   | Zagros 2001          |
| S11     | 53.69   | 31.36   | 1636  | 62    | Paul et al., 2006 | RF   | Zagros 2001          |
| P2      | 52.75   | 29.86   | 1640  | 47    | Paul et al., 2006 | RF   | Zagros 2001          |
| F1      | 52.43   | 29.69   | 1785  | 48    | Paul et al., 2006 | RF   | Zagros 2001          |
| B3      | 53.06   | 30.13   | 1842  | 44    | Paul et al., 2006 | RF   | Zagros 2001          |
| S9      | 53.02   | 31.09   | 1865  | 64    | Paul et al., 2006 | RF   | Zagros 2001          |
| P1      | 52.60   | 29.74   | 1867  | 46    | Paul et al., 2006 | RF   | Zagros 2001          |
| D2      | 54.71   | 32.43   | 1896  | 51    | Paul et al., 2006 | RF   | Zagros 2001          |
| M3      | 53.25   | 30.25   | 1903  | 50    | Paul et al., 2006 | RF   | Zagros 2001          |
| B2      | 52.50   | 30.19   | 1925  | 48    | Paul et al., 2006 | RF   | Zagros 2001          |
| A2      | 51.78   | 29.79   | 1935  | 50    | Paul et al., 2006 | RF   | Zagros 2001          |
| S3      | 54.12   | 31.71   | 1998  | 45    | Paul et al., 2006 | RF   | Zagros 2001          |
| P4      | 52.90   | 30.09   | 2027  | 46    | Paul et al., 2006 | RF   | Zagros 2001          |
| P6      | 53.27   | 30.37   | 2059  | 52    | Paul et al., 2006 | RF   | Zagros 2001          |
| D1      | 54.51   | 32.04   | 2159  | 43    | Paul et al., 2006 | RF   | Zagros 2001          |
| H5      | 54.52   | 32.30   | 2250  | 52    | Paul et al., 2006 | RF   | Zagros 2001          |
| P8      | 53.17   | 30.56   | 2277  | 55    | Paul et al., 2006 | RF   | Zagros 2001          |
| S12     | 53.86   | 31.65   | 2282  | 47    | Paul et al., 2006 | RF   | Zagros 2001          |
| M2      | 52.23   | 29.71   | 2391  | 49    | Paul et al., 2006 | RF   | Zagros 2001          |
| M6      | 53.81   | 31.58   | 2863  | 51    | Paul et al., 2006 | RF   | Zagros 2001          |
| E1      | 47.4788 | 33.091  | 595   | 45    | Paul et al., 2010 | RF   | Zagros 2003          |
| V8      | 47.7065 | 33.2094 | 758   | 48    | Paul et al., 2010 | RF   | Zagros 2003          |
| V9      | 47.7379 | 33.0551 | 773   | 47    | Paul et al., 2010 | RF   | Zagros 2003          |
| Z6      | 50.876  | 34.9372 | 819   | 44    | Paul et al., 2010 | RF   | Zagros 2003          |
| Z5      | 50.8244 | 34.7521 | 892   | 48    | Paul et al., 2010 | RF   | Zagros 2003          |
| V7      | 47.9408 | 33.2696 | 1003  | 48    | Paul et al., 2010 | RF   | Zagros 2003          |
| Z7      | 50.9849 | 35.0949 | 1088  | 45    | Paul et al., 2010 | RF   | Zagros 2003          |
| Z3      | 50.695  | 34.465  | 1102  | 50    | Paul et al., 2010 | RF   | Zagros 2003          |
| V6      | 47.9391 | 33.4507 | 1103  | 44    | Paul et al., 2010 | RF   | Zagros 2003          |
| V5      | 48.1244 | 33.4968 | 1166  | 43    | Paul et al., 2010 | RF   | Zagros 2003          |
| Z8      | 50.9003 | 35.2376 | 1274  | 43    | Paul et al., 2010 | RF   | Zagros 2003          |
| E3      | 48.1602 | 33.5    |       |       |                   |      |                      |

| Station | Lon.    | Lat.   | Elev. | Crust | Reference(s)                        | Data    | Project / Experiment |
|---------|---------|--------|-------|-------|-------------------------------------|---------|----------------------|
| KEHH    | 45,100  | 36,700 | 1765  | 50    | Gritto et al., 2008                 | RF      |                      |
| KSSS    | 46.2    | 35,700 | 1838  | 52    | Gritto et al., 2008                 | RF      |                      |
| GOA     | 73,837  | 15,464 | -2    | 42    | Gupta et al., 2003                  | RF      |                      |
| KDM     | 80,679  | 17,550 | 79    | 45    | Gupta et al., 2003                  | RF      |                      |
| E       | 79,399  | 16,002 | 143   | 37    | Gupta et al., 2003                  | RF      |                      |
| A       | 73,263  | 18,006 | 175   | 38    | Gupta et al., 2003                  | RF      |                      |
| F       | 78,648  | 15,455 | 333   | 35    | Gupta et al., 2003                  | RF      |                      |
| SLM     | 78,903  | 16,074 | 349   | 34    | Gupta et al., 2003                  | RF      |                      |
| NND     | 77,290  | 19,072 | 363   | 36    | Gupta et al., 2003                  | RF      |                      |
| MBN     | 77,659  | 16,821 | 481   | 34    | Gupta et al., 2003                  | RF      |                      |
| BKR     | 78,397  | 18,206 | 520   | 33    | Gupta et al., 2003                  | RF      |                      |
| KIL     | 76,616  | 18,047 | 593   | 36    | Gupta et al., 2003                  | RF      |                      |
| C       | 73,750  | 17,318 | 648   | 38    | Gupta et al., 2003                  | RF      |                      |
| DHR     | 74,985  | 15,396 | 693   | 43    | Gupta et al., 2003                  | RF      |                      |
| D       | 74,766  | 17,227 | 775   | 36    | Gupta et al., 2003                  | RF      |                      |
| B       | 74,015  | 17,988 | 854   | 38    | Gupta et al., 2003                  | RF      |                      |
| LTA     | 84,176  | 41,923 | 1072  | 38    | He et al., 2014                     | RF      |                      |
| AKS     | 80,112  | 40,993 | 1077  | 50    | He et al., 2014                     | RF      |                      |
| KUC     | 82,871  | 41,717 | 1088  | 41    | He et al., 2014                     | RF      |                      |
| BCH     | 78,772  | 39,685 | 1092  | 44    | He et al., 2014                     | RF      |                      |
| TAC     | 83,172  | 46,961 | 1095  | 51    | He et al., 2014                     | RF      |                      |
| LSG     | 84,294  | 45,523 | 1122  | 46    | He et al., 2014                     | RF      |                      |
| XKR     | 77,594  | 39,702 | 1145  | 47    | He et al., 2014                     | RF      |                      |
| RGN     | 87,710  | 43,732 | 1156  | 57    | He et al., 2014                     | RF      |                      |
| BRM     | 76,872  | 39,806 | 1184  | 49    | He et al., 2014                     | RF      |                      |
| HEF     | 85,784  | 46,750 | 1219  | 50    | He et al., 2014                     | RF      |                      |
| BAC     | 81,629  | 41,701 | 1298  | 43    | He et al., 2014                     | RF      |                      |
| HTA     | 79,894  | 37,178 | 1309  | 46    | He et al., 2014                     | RF      |                      |
| SMY     | 79,767  | 41,470 | 1344  | 49    | He et al., 2014                     | RF      |                      |
| RUQ     | 88,835  | 38,966 | 1353  | 51    | He et al., 2014                     | RF      |                      |
| FUY     | 89,630  | 47,041 | 1371  | 66    | He et al., 2014                     | RF      |                      |
| QHF     | 90,743  | 46,485 | 1381  | 48    | He et al., 2014                     | RF      |                      |
| MUL     | 90,290  | 43,787 | 1395  | 52    | He et al., 2014                     | RF      |                      |
| HBH     | 86,556  | 48,398 | 1420  | 58    | He et al., 2014                     | RF      |                      |
| LHG     | 87,063  | 43,547 | 1454  | 54    | He et al., 2014                     | RF      |                      |
| HTTZO   | 79,070  | 37,196 | 1491  | 58    | He et al., 2014                     | RF      |                      |
| KSH     | 75,563  | 39,071 | 1604  | 63    | He et al., 2014                     | RF      |                      |
| BTS     | 90,518  | 45,260 | 1669  | 41    | He et al., 2014                     | RF      |                      |
| YJS     | 76,475  | 38,475 | 1695  | 56    | He et al., 2014                     | RF      |                      |
| ATS     | 75,859  | 39,697 | 1716  | 55    | He et al., 2014                     | RF      |                      |
| ALT     | 88,122  | 47,961 | 1724  | 54    | He et al., 2014                     | RF      |                      |
| BKO     | 93,078  | 43,823 | 1830  | 36    | He et al., 2014                     | RF      |                      |
| YCH     | 77,369  | 37,441 | 1888  | 59    | He et al., 2014                     | RF      |                      |
| WUS     | 79,210  | 41,053 | 1901  | 57    | He et al., 2014                     | RF      |                      |
| WSU     | 84,648  | 44,018 | 2049  | 50    | He et al., 2014                     | RF      |                      |
| WNQ     | 80,998  | 44,892 | 2072  | 58    | He et al., 2014                     | RF      |                      |
| YUT     | 81,963  | 36,512 | 2160  | 63    | He et al., 2014                     | RF      |                      |
| WUQ     | 75,230  | 39,632 | 2162  | 54    | He et al., 2014                     | RF      |                      |
| SCH     | 85,694  | 43,818 | 2202  | 61    | He et al., 2014                     | RF      |                      |
| QMO     | 85,486  | 37,371 | 2502  | 43    | He et al., 2014                     | RF      |                      |
| CBC     | 81,437  | 43,367 | 3065  | 58    | He et al., 2014                     | RF      |                      |
| AHQ     | 78,612  | 40,770 | 3085  | 63    | He et al., 2014                     | RF      |                      |
| WMQ     | 88,147  | 43,799 | 3090  | 47    | He et al., 2014                     | RF      |                      |
| BLT     | 86,664  | 42,853 | 3257  | 45    | He et al., 2014                     | RF      |                      |
| HYS     | 89,079  | 43,040 | 446   | 44    | He et al., 2014                     | RF      |                      |
| FUH     | 87,205  | 47,013 | 508   | 43    | He et al., 2014                     | RF      |                      |
| KMY     | 84,820  | 45,611 | 527   | 58    | He et al., 2014                     | RF      |                      |
| WCW     | 89,010  | 44,857 | 543   | 43    | He et al., 2014                     | RF      |                      |
| JHE     | 83,014  | 44,524 | 682   | 42    | He et al., 2014                     | RF      |                      |
| ALS     | 82,120  | 45,067 | 820   | 36    | He et al., 2014                     | RF      |                      |
| XNY     | 83,303  | 43,457 | 849   | 59    | He et al., 2014                     | RF      |                      |
| KOL     | 85,799  | 41,798 | 911   | 52    | He et al., 2014                     | RF      |                      |
| YMS     | 94,024  | 41,964 | 983   | 48    | He et al., 2014                     | RF      |                      |
| SHZ     | 85,875  | 44,122 | 994   | 54    | He et al., 2014                     | RF      |                      |
| H0010   | 84,893  | 26,983 | 74    | 39    | Hetenyi, 2007; Nabelek et al., 2009 | RF      | HiClimb              |
| H0060   | 84,967  | 27,108 | 99    | 41    | Hetenyi, 2007; Nabelek et al., 2009 | RF      | HiClimb              |
| H0150   | 85,014  | 27,370 | 502   | 41    | Hetenyi, 2007; Nabelek et al., 2009 | RF      | HiClimb              |
| H0320   | 85,151  | 27,837 | 672   | 42    | Hetenyi, 2007; Nabelek et al., 2009 | RF      | HiClimb              |
| H0390   | 85,222  | 28,025 | 1691  | 44    | Hetenyi, 2007; Nabelek et al., 2009 | RF      | HiClimb              |
| H0230   | 85,073  | 27,580 | 2130  | 43    | Hetenyi, 2007; Nabelek et al., 2009 | RF      | HiClimb              |
| H0460   | 85,357  | 28,215 | 2372  | 47    | Hetenyi, 2007; Nabelek et al., 2009 | RF      | HiClimb              |
| H0510   | 85,349  | 28,386 | 3279  | 51    | Hetenyi, 2007; Nabelek et al., 2009 | RF      | HiClimb              |
| H580    | 85,270  | 28,632 | 4195  | 56    | Hetenyi, 2007; Nabelek et al., 2009 | RF      | HiClimb              |
| H620    | 85,296  | 28,796 | 4215  | 60    | Hetenyi, 2007; Nabelek et al., 2009 | RF      | HiClimb              |
| H1560   | 84,246  | 33,307 | 4520  | 66    | Hetenyi, 2007; Nabelek et al., 2009 | RF      | HiClimb              |
| H1440   | 84,240  | 32,454 | 4562  | 75    | Hetenyi, 2007; Nabelek et al., 2009 | RF      | HiClimb              |
| H700    | 85,422  | 29,056 | 4641  | 66    | Hetenyi, 2007; Nabelek et al., 2009 | RF      | HiClimb              |
| H1530   | 84,221  | 33,119 | 4647  | 70    | Hetenyi, 2007; Nabelek et al., 2009 | RF      | HiClimb              |
| H1220   | 85,069  | 30,860 | 4700  | 78    | Hetenyi, 2007; Nabelek et al., 2009 | RF      | HiClimb              |
| H780    | 85,237  | 29,341 | 4775  | 73    | Hetenyi, 2007; Nabelek et al., 2009 | RF      | HiClimb              |
| H1210   | 85,109  | 30,782 | 4786  | 78    | Hetenyi, 2007; Nabelek et al., 2009 | RF      | HiClimb              |
| H1280   | 85,130  | 31,302 | 4795  | 79    | Hetenyi, 2007; Nabelek et al., 2009 | RF      | HiClimb              |
| H1170   | 85,197  | 30,495 | 4852  | 78    | Hetenyi, 2007; Nabelek et al., 2009 | RF      | HiClimb              |
| H1580   | 84,291  | 33,533 | 4871  | 68    | Hetenyi, 2007; Nabelek et al., 2009 | RF      | HiClimb              |
| H1260   | 85,012  | 31,155 | 5010  | 79    | Hetenyi, 2007; Nabelek et al., 2009 | RF      | HiClimb              |
| H1150   | 85,313  | 30,358 | 5072  | 78    | Hetenyi, 2007; Nabelek et al., 2009 | RF      | HiClimb              |
| H1040   | 85,740  | 29,561 | 5121  | 78    | Hetenyi, 2007; Nabelek et al., 2009 | RF      | HiClimb              |
| H1071   | 85,775  | 29,770 | 5234  | 79    | Hetenyi, 2007; Nabelek et al., 2009 | RF      | HiClimb              |
| H1310   | 85,183  | 31,515 | 5279  | 80    | Hetenyi, 2007; Nabelek et al., 2009 | RF      | HiClimb              |
| H1110   | 85,553  | 30,066 | 5364  | 78    | Hetenyi, 2007; Nabelek et al., 2009 | RF      | HiClimb              |
| H1630   | 84,227  | 34,065 | 5426  | 68    | Hetenyi, 2007; Nabelek et al., 2009 | RF      | HiClimb              |
| T0010   | 87,682  | 28,012 | 4830  | 69    | Hetenyi, 2007; Nabelek et al., 2009 | RF      | HiClimb              |
| T0020   | 85,969  | 28,167 | 4264  | 58    | Hetenyi, 2007; Nabelek et al., 2009 | RF      | HiClimb              |
| T0040   | 87,356  | 28,165 | 3818  | 64    | Hetenyi, 2007; Nabelek et al., 2009 | RF      | HiClimb              |
| T0050   | 87,742  | 28,193 | 4255  | 68    | Hetenyi, 2007; Nabelek et al., 2009 | RF      | HiClimb              |
| T0060   | 88,099  | 28,156 | 4380  | 71    | Hetenyi, 2007; Nabelek et al., 2009 | RF      | HiClimb              |
| T0070   | 88,515  | 28,279 | 4712  | 70    | Hetenyi, 2007; Nabelek et al., 2009 | RF      | HiClimb              |
| T0080   | 88,991  | 28,257 | 4794  | 69    | Hetenyi, 2007; Nabelek et al., 2009 | RF      | HiClimb              |
| T0090   | 89,392  | 28,269 | 4477  | 74    | Hetenyi, 2007; Nabelek et al., 2009 | RF      | HiClimb              |
| T0100   | 86,097  | 28,432 | 4797  | 59    | Hetenyi, 2007; Nabelek et al., 2009 | RF      | HiClimb              |
| T0110   | 86,131  | 28,649 | 4775  | 59    | Hetenyi, 2007; Nabelek et al., 2009 | RF      | HiClimb              |
| T0130   | 87,070  | 28,580 | 4375  | 63    | Hetenyi, 2007; Nabelek et al., 2009 | RF      | HiClimb              |
| T0140   | 87,758  | 28,536 | 4575  | 67    | Hetenyi, 2007; Nabelek et al., 2009 | RF      | HiClimb              |
| T0150   | 86,377  | 28,888 | 4429  | 60    | Hetenyi, 2007; Nabelek et al., 2009 | RF      | HiClimb              |
| T0160   | 87,424  | 28,900 | 5144  | 66    | Hetenyi, 2007; Nabelek et al., 2009 | RF      | HiClimb              |
| T0170   | 87,950  | 28,838 | 4610  | 67    | Hetenyi, 2007; Nabelek et al., 2009 | RF      | HiClimb              |
| T0180   | 88,392  | 28,993 | 4089  | 73    | Hetenyi, 2007; Nabelek et al., 2009 | RF      | HiClimb              |
| T0190   | 88,781  | 28,893 | 4527  | 75    | Hetenyi, 2007; Nabelek et al., 2009 | RF      | HiClimb              |
| T0200   | 89,162  | 28,937 | 4358  | 74    | Hetenyi, 2007; Nabelek et al., 2009 | RF      | HiClimb              |
| T0230   | 86,398  | 29,056 | 5119  | 60    | Hetenyi, 2007; Nabelek et al., 2009 | RF      | HiClimb              |
| T0250   | 88,159  | 29,145 | 4184  | 68    | Hetenyi, 2007; Nabelek et al., 2009 | RF      | HiClimb              |
| T0260   | 86,685  | 29,449 | 4623  | 62    | Hetenyi, 2007; Nabelek et al., 2009 | RF      | HiClimb              |
| T0270   | 87,652  | 29,423 | 4811  | 63    | Hetenyi, 2007; Nabelek et al., 2009 | RF      | HiClimb              |
| T0280   | 88,230  | 29,430 | 4025  | 64    | Hetenyi, 2007; Nabelek et al., 2009 | RF      | HiClimb              |
| T0310   | 86,814  | 29,787 | 5305  | 70    | Hetenyi, 2007; Nabelek et al., 2009 | RF      | HiClimb              |
| T0320   | 88,350  | 29,770 | 5230  | 75    | Hetenyi, 2007; Nabelek et al., 2009 | RF      | HiClimb              |
| T0340   | 89,718  | 29,688 | 4490  | 76    | Hetenyi, 2007; Nabelek et al., 2009 | RF      | HiClimb              |
| T0350   | 86,508  | 30,126 | 4926  | 76    | Hetenyi, 2007; Nabelek et al., 2009 | RF      | HiClimb              |
| T0360   | 86,965  | 30,101 | 5095  | 77    | Hetenyi, 2007; Nabelek et al., 2009 | RF      | HiClimb              |
| T0370   | 88,355  | 29,955 | 4779  | 74    | Hetenyi, 2007; Nabelek et al., 2009 | RF      | HiClimb              |
| T0380   | 86,931  | 30,442 | 5088  | 75    | Hetenyi, 2007; Nabelek et al., 2009 | RF      | HiClimb              |
| 1       | 97,127  | 37,391 | 3215  | 68    | Jiang et al., 2006                  | seismic |                      |
| 2       | 97,242  | 36,582 | 2739  | 57    | Jiang et al., 2006                  | seismic |                      |
| 3       | 100,386 | 37,132 | 3213  | 58    | Jiang et al., 2006                  | seismic |                      |
| 4       | 98,705  | 36,561 | 3545  | 66    | Jiang et al., 2006                  | seismic |                      |

| Station | Lon.    | Lat.    | Elev. | Crust | Reference(s)                | Data | Project / Experiment |
|---------|---------|---------|-------|-------|-----------------------------|------|----------------------|
| THAK    | 85,700  | 27,600  | 927   | 46    | Schulte-Peklum et al., 2005 | RF   | HIMNT                |
| ILAM    | 87,850  | 26,850  | 1274  | 46    | Schulte-Peklum et al., 2005 | RF   | HIMNT                |
| SIND    | 85,900  | 27,300  | 1419  | 46    | Schulte-Peklum et al., 2005 | RF   | HIMNT                |
| BUNG    | 85,900  | 27,900  | 2428  | 51    | Schulte-Peklum et al., 2005 | RF   | HIMNT                |
| LAZE    | 87,700  | 29,150  | 4086  | 75    | Schulte-Peklum et al., 2005 | RF   | HIMNT                |
| SAJA    | 88,000  | 28,850  | 4512  | 75    | Schulte-Peklum et al., 2005 | RF   | HIMNT                |
| NAIL    | 86,500  | 28,600  | 4613  | 72    | Schulte-Peklum et al., 2005 | RF   | HIMNT                |
| XIXI    | 85,800  | 28,800  | 4700  | 72    | Schulte-Peklum et al., 2005 | RF   | HIMNT                |
| MNBU    | 86,200  | 28,800  | 4821  | 73    | Schulte-Peklum et al., 2005 | RF   | HIMNT                |
| SAGA    | 85,300  | 29,500  | 5089  | 83    | Schulte-Peklum et al., 2005 | RF   | HIMNT                |
| RC14    | 86,400  | 29,650  | 5662  | 78    | Schulte-Peklum et al., 2005 | RF   | HIMNT                |
| XBA     | 97,788  | 36,070  | 2954  | 52    | Shi et al., 2009            | RF   | Kunlun Shan          |
| DLN     | 97,998  | 36,401  | 3031  | 55    | Shi et al., 2009            | RF   | Kunlun Shan          |
| XGA     | 97,935  | 35,930  | 3202  | 47    | Shi et al., 2009            | RF   | Kunlun Shan          |
| QWA     | 98,130  | 35,760  | 3584  | 65    | Shi et al., 2009            | RF   | Kunlun Shan          |
| QSA     | 98,410  | 35,670  | 3832  | 65    | Shi et al., 2009            | RF   | Kunlun Shan          |
| ZYU     | 98,550  | 35,590  | 4065  | 66    | Shi et al., 2009            | RF   | Kunlun Shan          |
| MSAG    | 72,730  | 31,720  | 166   | 37    | Soomoro, 2009               | RF   |                      |
| MFAG    | 72,620  | 33,650  | 429   | 44    | Soomoro, 2009               | RF   |                      |
| MNIL    | 73,480  | 33,700  | 1201  | 52    | Soomoro, 2009               | RF   |                      |
| ERBA    | 36.7547 | 40.6814 | 1016  | 34    | Tezel et al., 2013          | RF   |                      |
| ALT     | 30.1103 | 39.0552 | 1028  | 34    | Tezel et al., 2013          | RF   |                      |
| SUSE    | 38.2025 | 40.2086 | 1050  | 41    | Tezel et al., 2013          | RF   |                      |
| AFSR    | 33.0707 | 39.4468 | 1062  | 36    | Tezel et al., 2013          | RF   |                      |

| Station | Lon.    | Lat.   | Elev. | Crust | Reference(s)               | Data    | Project / Experiment |
|---------|---------|--------|-------|-------|----------------------------|---------|----------------------|
| 5       | 100,170 | 36,161 | 2892  | 58    | Jiang et al., 2006         | seismic |                      |
| 6       | 98,788  | 35,855 | 4535  | 70    | Jiang et al., 2006         | seismic |                      |
| 7       | 97,575  | 35,623 | 4578  | 77    | Jiang et al., 2006         | seismic |                      |
| ISML    | 80,300  | 37,800 | 1225  | 45    | Kao et al., 2001           | RF      |                      |
| TSRN    | 80,700  | 37,200 | 1281  | 51    | Kao et al., 2001           | RF      |                      |
| CHRS    | 80,700  | 36,800 | 1681  | 52    | Kao et al., 2001           | RF      |                      |
| WRKS    | 80,700  | 36,350 | 2578  | 53    | Kao et al., 2001           | RF      |                      |
| q       | 94,700  | 36,500 | 2750  | 70    | Kind et al., 2002          | RF      | Passcal - Indepth II |
| d       | 90,740  | 30,000 | 4452  | 81    | Kind et al., 2002          | RF      | Passcal - Indepth II |
| l       | 93,200  | 34,000 | 4490  | 72    | Kind et al., 2002          | RF      | Passcal - Indepth II |
| g       | 91,670  | 31,500 | 4554  | 73    | Kind et al., 2002          | RF      | Passcal - Indepth II |
| p       | 94,440  | 36,000 | 4608  | 72    | Kind et al., 2002          | RF      | Passcal - Indepth II |
| m       | 93,480  | 34,500 | 4656  | 76    | Kind et al., 2002          | RF      | Passcal - Indepth II |
| k       | 92,870  | 33,500 | 4680  | 71    | Kind et al., 2002          | RF      | Passcal - Indepth II |
| a       | 89,820  | 28,500 | 4748  | 75    | Kind et al., 2002          | RF      | Passcal - Indepth II |
| n       | 93,780  | 35,000 | 4868  | 74    | Kind et al., 2002          | RF      | Passcal - Indepth II |
| c       | 90,330  | 29,500 | 4898  | 81    | Kind et al., 2002          | RF      | Passcal - Indepth II |
| f       | 91,320  | 31,000 | 4912  | 74    | Kind et al., 2002          | RF      | Passcal - Indepth II |
| o       | 94,090  | 35,500 | 4919  | 72    | Kind et al., 2002          | RF      | Passcal - Indepth II |
| h       | 91,970  | 32,000 | 4933  | 70    | Kind et al., 2002          | RF      | Passcal - Indepth II |
| j       | 92,520  | 33,000 | 5086  | 70    | Kind et al., 2002          | RF      | Passcal - Indepth II |
| l       | 92,240  | 32,500 | 5143  | 70    | Kind et al., 2002          | RF      | Passcal - Indepth II |
| e       | 90,980  | 30,500 | 5281  | 78    | Kind et al., 2002          | RF      | Passcal - Indepth II |
| b       | 90,200  | 29,000 | 5602  | 79    | Kind et al., 2002          | RF      | Passcal - Indepth II |
| JPA     | 90,570  | 26,220 | 27    | 41    | Kumar et al., 2004         | RF      |                      |
| TEZ     | 92,780  | 26,620 | 54    | 41    | Kumar et al., 2004         | RF      |                      |
| BKD     | 82,110  | 26,920 | 93    | 53    | Kumar et al., 2004         | RF      |                      |
| DMK     | 93,060  | 26,220 | 98    | 34    | Kumar et al., 2004         | RF      |                      |
| NGB     | 90,750  | 25,470 | 306   | 35    | Kumar et al., 2004         | RF      |                      |
| HMN     | 92,580  | 25,850 | 470   | 33    | Kumar et al., 2004         | RF      |                      |
| ZIR     | 93,760  | 27,470 | 1307  | 38    | Kumar et al., 2004         | RF      |                      |
| SHL     | 91,880  | 25,570 | 1363  | 36    | Kumar et al., 2004         | RF      |                      |
| RUP     | 92,400  | 27,200 | 1986  | 47    | Kumar et al., 2004         | RF      |                      |
| VISK    | 83,300  | 17,700 | 14    | 35    | Kumar et al., 2001         | RF      | GSN/IMD              |
| BHUJ    | 69,700  | 23,300 | 75    | 44    | Kumar et al., 2001         | RF      | GSN/IMD              |
| BLSP    | 82,100  | 22,100 | 280   | 39    | Kumar et al., 2001         | RF      | GSN/IMD              |
| AJMR    | 74,600  | 26,500 | 531   | 30    | Kumar et al., 2001         | RF      | GSN/IMD              |
| KARD    | 74,200  | 17,300 | 592   | 37    | Kumar et al., 2001         | RF      | GSN/IMD              |
| PUNE    | 73,800  | 18,500 | 607   | 37    | Kumar et al., 2001         | RF      | GSN/IMD              |
| KGD     | 80,690  | 17,660 | 117   | 37    | Kumar et al., 2007         | RF      |                      |
| BOKR    | 85,900  | 23,800 | 307   | 41    | Kumar et al., 2007         | RF      | GSN/IMD              |
| BHPL    | 77,425  | 23,241 | 487   | 38    | Kumar et al., 2007         | RF      |                      |
| HYB     | 78,550  | 17,420 | 528   | 30    | Kumar et al., 2007         | RF      | IRIS                 |
| ABKT    | 58,119  | 37,930 | 634   | 43    | Kumar et al., 2007         | RF      | IRIS                 |
| DHD     | 74,984  | 15,433 | 704   | 39    | Kumar et al., 2007         | RF      |                      |
| SHAB    | 72,160  | 34,250 | 311   | 52    | Li and Mashele, 2009       | RF      |                      |
| SBAR    | 72,650  | 34,080 | 396   | 53    | Li and Mashele, 2009       | RF      |                      |
| MNSR    | 73,150  | 34,520 | 1428  | 56    | Li and Mashele, 2009       | RF      |                      |
| BTGM    | 73,000  | 34,700 | 1619  | 62    | Li and Mashele, 2009       | RF      |                      |
| PATN    | 73,100  | 35,150 | 1671  | 67    | Li and Mashele, 2009       | RF      |                      |
| SHIN    | 72,550  | 35,210 | 2120  | 72    | Li and Mashele, 2009       | RF      |                      |
| SADU    | 72,670  | 34,800 | 2131  | 64    | Li and Mashele, 2009       | RF      |                      |
| KALM    | 72,580  | 35,510 | 2908  | 79    | Li and Mashele, 2009       | RF      |                      |
|         | 79,188  | 36,255 | 4362  | 63    | Li et al., 2001            | seismic |                      |
|         | 79,076  | 37,112 | 1720  | 57    | Li et al., 2001            | seismic |                      |
|         | 80,474  | 38,105 | 1204  | 44    | Li et al., 2001            | seismic |                      |
|         | 80,903  | 38,854 | 1121  | 42    | Li et al., 2001            | seismic |                      |
|         | 81,097  | 40,045 | 1029  | 42    | Li et al., 2001            | seismic |                      |
| gx      | 104,700 | 28,600 | 390   | 42    | Li et al., 2008            | RF      | Yunnan               |
| jh      | 100,700 | 22,000 | 928   | 32    | Li et al., 2008            | RF      | Yunnan               |
| wd      | 98,100  | 24,100 | 1008  | 34    | Li et al., 2008            | RF      | Yunnan               |
| yx      | 100,100 | 24,400 | 1185  | 36    | Li et al., 2008            | RF      | Yunnan               |
| pz      | 101,700 | 26,500 | 1267  | 44    | Li et al., 2008            | RF      | Yunnan               |
| zx      | 104,900 | 27,400 | 1508  | 46    | Li et al., 2008            | RF      | Yunnan               |
| sm      | 101,000 | 22,800 | 1542  | 34    | Li et al., 2008            | RF      | Yunnan               |
| ml      | 103,400 | 24,400 | 1552  | 42    | Li et al., 2008            | RF      | Yunnan               |
| ws      | 104,300 | 23,400 | 1593  | 38    | Li et al., 2008            | RF      | Yunnan               |
| tc      | 98,500  | 25,000 | 1631  | 42    | Li et al., 2008            | RF      | Yunnan               |
| gj      | 103,200 | 23,400 | 1646  | 42    | Li et al., 2008            | RF      | Yunnan               |
| cy      | 99,300  | 23,100 | 1692  | 34    | Li et al., 2008            | RF      | Yunnan               |
| ym      | 102,200 | 24,700 | 1736  | 46    | Li et al., 2008            | RF      | Yunnan               |
| lq      | 102,500 | 25,500 | 1841  | 44    | Li et al., 2008            | RF      | Yunnan               |
| th      | 102,800 | 24,100 | 1842  | 42    | Li et al., 2008            | RF      | Yunnan               |
| cx      | 101,500 | 25,000 | 1859  | 46    | Li et al., 2008            | RF      | Yunnan               |
| zt      | 103,700 | 27,300 | 1869  | 46    | Li et al., 2008            | RF      | Yunnan               |
| dc      | 103,200 | 26,100 | 1953  | 44    | Li et al., 2008            | RF      | Yunnan               |
| ts      | 100,300 | 25,600 | 1988  | 44    | Li et al., 2008            | RF      | Yunnan               |
| ma      | 103,600 | 25,400 | 2060  | 44    | Li et al., 2008            | RF      | Yunnan               |
| hl      | 102,700 | 25,100 | 2084  | 46    | Li et al., 2008            | RF      | Yunnan               |
| hq      | 100,200 | 26,500 | 2201  | 50    | Li et al., 2008            | RF      | Yunnan               |
| bs      | 99,100  | 25,100 | 2245  | 40    | Li et al., 2008            | RF      | Yunnan               |
| yl      | 99,400  | 25,900 | 2396  | 44    | Li et al., 2008            | RF      | Yunnan               |
| ey      | 99,900  | 26,100 | 2455  | 48    | Li et al., 2008            | RF      | Yunnan               |
| wx      | 99,300  | 27,200 | 2549  | 54    | Li et al., 2008            | RF      | Yunnan               |
| lj      | 100,200 | 26,900 | 2589  | 54    | Li et al., 2008            | RF      | Yunnan               |
| ys      | 100,800 | 26,700 | 2653  | 52    | Li et al., 2008            | RF      | Yunnan               |
| xc      | 99,800  | 28,900 | 3270  | 44    | Li et al., 2008            | RF      | Yunnan               |
| zd      | 99,700  | 27,800 | 3311  | 56    | Li et al., 2008            | RF      | Yunnan               |
| MDS     | 103,082 | 30,070 | 794   | 42    | Lou et al., 2009           | RF      | Permanent Stations   |
| QCH     | 105,300 | 32,600 | 1106  | 43    | Lou et al., 2009           | RF      | Permanent Stations   |
| PWU     | 104,520 | 32,420 | 1294  | 45    | Lou et al., 2009           | RF      | Permanent Stations   |
| SPA     | 103,682 | 32,837 | 3392  | 48    | Lou et al., 2009           | RF      | Permanent Stations   |
| MEK     | 102,221 | 31,901 | 3421  | 56    | Lou et al., 2009           | RF      | Permanent Stations   |
| LNK     | 48,860  | 38,750 | -28   | 33    | Magino and Priestley, 1998 | seismic | Permanent Stations   |
| KAT     | 56,270  | 39,028 | 61    | 30    | Magino and Priestley, 1998 | seismic | Permanent Stations   |
| KRF     | 53,003  | 40,013 | 98    | 47    | Magino and Priestley, 1998 | seismic | Permanent Stations   |
| NBD     | 54,383  | 39,510 | 274   | 46    | Magino and Priestley, 1998 | seismic | Permanent Stations   |
| ABKT    | 58,119  | 37,930 | 634   | 45    | Magino and Priestley, 1998 | seismic | Permanent Stations   |
| 1       | 75,968  | 40,318 | 3686  | 52    | Makarov et al., 2010       | seismic |                      |
| 2       | 75,045  | 41,338 | 1876  | 44    | Makarov et al., 2010       | seismic |                      |
| 3       | 75,285  | 41,015 | 3360  | 53    | Makarov et al., 2010       | seismic |                      |
| 4       | 75,061  | 41,776 | 3002  | 47    | Makarov et al., 2010       | seismic |                      |
| 220     | 73,082  | 40,388 | 2023  | 57    | Mechie et al., 2012        | RF      | TIPAGE               |
| 166     | 73,467  | 39,624 | 3414  | 65    | Mechie et al., 2012        | RF      | TIPAGE               |
| 236     | 73,170  | 39,996 | 3622  | 62    | Mechie et al., 2012        | RF      | TIPAGE               |
| 232     | 73,919  | 38,148 | 3656  | 69    | Mechie et al., 2012        | RF      | TIPAGE               |
| 227     | 73,708  | 37,833 | 4116  | 68    | Mechie et al., 2012        | RF      | TIPAGE               |
| 3       | 74,643  | 37,515 | 4226  | 66    | Mechie et al., 2012        | RF      | TIPAGE               |
| 230     | 73,746  | 38,877 | 4649  | 75    | Mechie et al., 2012        | RF      | TIPAGE               |
| 229     | 73,588  | 38,573 | 4747  | 74    | Mechie et al., 2012        | RF      | TIPAGE               |
| 281     | 73,482  | 39,243 | 4832  | 71    | Mechie et al., 2012        | RF      | TIPAGE               |
| LKR     | 48,900  | 38,700 | -31   | 40    | Mellors et al., 2008       | RF      | Caucasus             |
| NDR     | 49,987  | 40,581 | -27   | 46    | Mellors et al., 2008       | RF      | Caucasus             |
| GAL     | 50,100  | 40,500 | 0     | 46    | Mellors et al., 2008       | RF      | Caucasus             |
| KTUT    | 39,800  | 40,987 | 1     | 42    | Mellors et al., 2008       | RF      | Caucasus             |
| ALI     | 49,100  | 40,000 | 74    | 46    | Mellors et al., 2008       | RF      | Caucasus             |
| GLB     | 48,393  | 39,243 | 122   | 38    | Mellors et al., 2008       | RF      | Caucasus             |
| GOB     | 49,733  | 40,401 | 148   | 48    | Mellors et al., 2008       | RF      | Caucasus             |
| SIZ     | 49,000  | 41,100 | 214   | 44    | Mellors et al., 2008       | RF      | Caucasus             |
| GAN     | 46,500  | 40,600 | 478   | 44    | Mellors et al., 2008       | RF      | Caucasus             |
| MTDA    | 44,750  | 41,700 | 490   | 49    | Mellors et al., 2008       | RF      | Caucasus             |
| GARJ    | 45,500  | 41,450 | 613   | 51    | Mellors et al., 2008       | RF      | Caucasus             |
| BCA     | 41,622  | 41,445 | 679   | 49    | Mellors et al., 2008       | RF      | Caucasus             |
| QUB     | 48,360  | 41,380 | 850   | 50    | Mellors et al., 2008       | RF      | Caucasus             |
| IML     | 48,182  | 40,793 | 897   | 45    | Mellors et al., 2008       | RF      | Caucasus             |

| Station | Lon.    | Lat.   | Elev. | Crust | Reference(s)        | Data | Project / Experiment    |
|---------|---------|--------|-------|-------|---------------------|------|-------------------------|
| JSO2    | 92,985  | 35,169 | 4715  | 79    | Tilmann, 2011       | RF   |                         |
| KSN3    | 94,621  | 35,760 | 4764  | 80    | Tilmann, 2011       | RF   |                         |
| JSO25   | 92,804  | 34,643 | 5011  | 81    | Tilmann, 2011       | RF   |                         |
| LPS05   | 106,175 | 36,327 | 1571  | 54    | Tong et al., 2007   | RF   | Liupan seismic array    |
| LPS08   | 106,308 | 36,639 | 1599  | 55    | Tong et al., 2007   | RF   | Liupan seismic array    |
| LPS07   | 106,265 | 36,521 | 1608  | 52    | Tong et al., 2007   | RF   | Liupan seismic array    |
| LPS09   | 106,418 | 36,725 | 1655  | 55    | Tong et al., 2007   | RF   | Liupan seismic array    |
| LPS13   | 106,910 | 36,590 | 1677  | 51    | Tong et al., 2007   | RF   | Liupan seismic array    |
| LPS12   | 106,788 | 36,632 | 1750  | 49    | Tong et al., 2007   | RF   | Liupan seismic array    |
| LPS10   | 106,543 | 36,740 | 1763  | 52    | Tong et al., 2007   | RF   | Liupan seismic array    |
| LPS11   | 106,659 | 36,669 | 1853  | 51    | Tong et al., 2007   | RF   | Liupan seismic array    |
| LPS06   | 106,270 | 36,363 | 1901  | 52    | Tong et al., 2007   | RF   | Liupan seismic array    |
| LPS02   | 105,891 | 36,146 | 1936  | 49    | Tong et al., 2007   | RF   | Liupan seismic array    |
| LPS03   | 106,027 | 36,171 | 2151  | 53    | Tong et al., 2007   | RF   | Liupan seismic array    |
| LPS01   | 105,731 | 36,118 | 2210  | 51    | Tong et al., 2007   | RF   | Liupan seismic array    |
| 199     | 100,654 | 36,304 | 3039  | 50    | Vergne et al., 2002 | RF   | Kunlun                  |
| TUNL    | 94,815  | 36,199 | 3069  | 70    | Vergne et al., 2002 | RF   | Tibet. Plat. Sism. Exp. |
| 105     | 99,929  | 35,877 | 3359  | 55    | Vergne et al., 2002 | RF   | Kunlun                  |
| MAQI    | 100,249 | 34,478 | 3942  | 59    | Vergne et al., 2002 | RF   | Tibet. Plat. Sism. Exp. |
| 139     | 97,036  | 32,951 | 4086  | 73    | Vergne et al., 2002 | RF   | Kunlun                  |
| 119     | 98,130  | 34,812 | 4246  | 56    | Vergne et al., 2002 | RF   | Kunlun                  |
| 129     | 97,187  | 33,627 | 4258  | 77    | Vergne et al., 2002 | RF   | Kunlun                  |
| 114     | 98,859  | 35,090 | 4260  | 54    | Vergne et al., 2002 | RF   | Kunlun                  |
| 245     | 96,750  | 32,891 | 4321  | 74    | Vergne et al., 2002 | RF   | Kunlun                  |
| 109/111 | 99,485  | 35,445 | 4330  | 50    | Vergne et al., 2002 | RF   | Kunlun                  |
| USHU    | 97,015  | 33,011 | 4348  | 74    | Vergne et al., 2002 | RF   | Tibet. Plat. Sism. Exp. |
| 118     | 98,244  | 34,888 | 4356  | 58    | Vergne et al., 2002 | RF   | Kunlun                  |
| 116     | 98,616  | 35,021 | 4451  | 60    | Vergne et al., 2002 | RF   | Kunlun                  |
| 127     | 97,279  | 33,921 | 4490  | 64    | Vergne et al., 2002 | RF   | Kunlun                  |
| ERDO    | 92,707  | 34,520 | 4611  | 74    | Vergne et al., 2002 | RF   | Tibet. Plat. Sism. Exp. |
| BUDO    | 93,910  | 35,529 | 4652  | 71    | Vergne et al., 2002 | RF   | Tibet. Plat. Sism. Exp. |
| AMDO    | 91,688  | 32,247 | 4728  | 67    | Vergne et al., 2002 | RF   | Tibet. Plat. Sism. Exp. |



| Station | Lon.   | Lat.   | Elev. | Crust | Reference(s)           | Data | Project / Experiment   |
|---------|--------|--------|-------|-------|------------------------|------|------------------------|
| NAX     | 45,495 | 39,174 | 925   | 47    | Mellors et al., 2008   | RF   | Caucasus               |
| ONI     | 43,453 | 42,590 | 1010  | 49    | Mellors et al., 2008   | RF   | Caucasus               |
| SEK     | 47,198 | 41,209 | 1197  | 47    | Mellors et al., 2008   | RF   | Caucasus               |
| CUKT    | 43,608 | 37,247 | 1236  | 47    | Mellors et al., 2008   | RF   | Caucasus               |
| SIRT    | 42,439 | 37,501 | 1324  | 47    | Mellors et al., 2008   | RF   | Caucasus               |
| PQL     | 48,593 | 40,789 | 1431  | 47    | Mellors et al., 2008   | RF   | Caucasus               |
| PTK     | 39,392 | 38,892 | 1671  | 39    | Mellors et al., 2008   | RF   | Caucasus               |
| VANB    | 43,389 | 38,595 | 1937  | 47    | Mellors et al., 2008   | RF   | Caucasus               |
| GNI     | 44,741 | 40,150 | 1993  | 46    | Mellors et al., 2008   | RF   | Caucasus               |
| CLDR    | 43,917 | 39,143 | 2063  | 44    | Mellors et al., 2008   | RF   | Caucasus               |
| SEMB    | 44,750 | 37,200 | 2705  | 47    | Mellors et al., 2008   | RF   | Caucasus               |
| XNR     | 86,180 | 41,616 | 915   | 51    | Mi et al., 2005        | RF   | Portable Seismic Array |
| WTC     | 86,177 | 41,707 | 941   | 51    | Mi et al., 2005        | RF   | Portable Seismic Array |
| KRL     | 86,174 | 41,790 | 1035  | 52    | Mi et al., 2005        | RF   | Portable Seismic Array |
| TSR     | 86,279 | 41,838 | 1059  | 47    | Mi et al., 2005        | RF   | Portable Seismic Array |
| XCK     | 86,299 | 41,980 | 1072  | 44    | Mi et al., 2005        | RF   | Portable Seismic Array |
| CCC     | 86,139 | 42,280 | 1114  | 47    | Mi et al., 2005        | RF   | Portable Seismic Array |
| NMD     | 86,233 | 42,098 | 1146  | 44    | Mi et al., 2005        | RF   | Portable Seismic Array |
| HJG     | 86,279 | 42,658 | 1724  | 54    | Mi et al., 2005        | RF   | Portable Seismic Array |
| BLT     | 86,317 | 42,764 | 1954  | 54    | Mi et al., 2005        | RF   | Portable Seismic Array |
| KMG     | 92,344 | 24,847 | 12    | 39    | Mitra et al., 2005     | RF   | SHL/NGR                |
| BQI     | 91,740 | 26,318 | 32    | 40    | Mitra et al., 2005     | RF   | SHL/NGR                |
| GAU     | 91,650 | 26,150 | 53    | 35    | Mitra et al., 2005     | RF   | SHL/NGR                |
| TEZ     | 92,833 | 26,633 | 58    | 42    | Mitra et al., 2005     | RF   | SHL/NGR                |
| BPN     | 91,909 | 25,670 | 1021  | 36    | Mitra et al., 2005     | RF   | SHL/NGR                |
| SHL     | 91,856 | 25,566 | 1287  | 39    | Mitra et al., 2005     | RF   | SHL/NGR                |
| CHP-S   | 91,724 | 25,281 | 1538  | 46    | Mitra et al., 2005     | RF   | SHL/NGR                |
| BMD     | 92,418 | 27,271 | 1989  | 44    | Mitra et al., 2005     | RF   | SHL/NGR                |
| BB14    | 90,185 | 29,368 | 3922  | 84    | Mitra et al., 2005     | RF   | SHL/NGR                |
| LSA     | 91,150 | 29,700 | 4075  | 92    | Mitra et al., 2005     | RF   | SHL/NGR                |
| BB18    | 89,744 | 28,930 | 4316  | 80    | Mitra et al., 2005     | RF   | SHL/NGR                |
| SP27    | 89,076 | 27,671 | 4331  | 52    | Mitra et al., 2005     | RF   | SHL/NGR                |
| BB20    | 89,664 | 28,727 | 4408  | 66    | Mitra et al., 2005     | RF   | SHL/NGR                |
| BB23    | 89,659 | 28,486 | 4566  | 73    | Mitra et al., 2005     | RF   | SHL/NGR                |
| SP25    | 89,303 | 28,178 | 4789  | 67    | Mitra et al., 2005     | RF   | SHL/NGR                |
| KGP     | 87,311 | 22,319 | 31    | 38    | Mitra et al., 2008     | RF   | Permanent Stations     |
| ID19    | 35,280 | 30,770 | -176  | 35    | Mohsen et al., 2006    | RF   | DESERT                 |
| ID27    | 35,240 | 30,660 | -107  | 34    | Mohsen et al., 2006    | RF   | DESERT                 |
| ID28    | 35,160 | 30,360 | 71    | 34    | Mohsen et al., 2006    | RF   | DESERT                 |
| JD08    | 35,050 | 29,720 | 98    | 33    | Mohsen et al., 2006    | RF   | DESERT                 |
| JD03    | 35,410 | 30,620 | 107   | 32    | Mohsen et al., 2006    | RF   | DESERT                 |
| ID01    | 34,540 | 31,200 | 131   | 31    | Mohsen et al., 2006    | RF   | DESERT                 |
| JD04    | 35,340 | 30,400 | 188   | 34    | Mohsen et al., 2006    | RF   | DESERT                 |
| ID02    | 34,710 | 31,240 | 209   | 32    | Mohsen et al., 2006    | RF   | DESERT                 |
| JD06    | 35,210 | 30,090 | 213   | 36    | Mohsen et al., 2006    | RF   | DESERT                 |
| JD05    | 35,230 | 30,260 | 222   | 35    | Mohsen et al., 2006    | RF   | DESERT                 |
| ID31    | 35,130 | 30,080 | 234   | 33    | Mohsen et al., 2006    | RF   | DESERT                 |
| ID15    | 35,080 | 30,870 | 261   | 32    | Mohsen et al., 2006    | RF   | DESERT                 |
| ID26    | 34,690 | 30,970 | 291   | 31    | Mohsen et al., 2006    | RF   | DESERT                 |
| ID22    | 35,020 | 30,180 | 293   | 33    | Mohsen et al., 2006    | RF   | DESERT                 |
| ID32    | 35,060 | 29,970 | 314   | 32    | Mohsen et al., 2006    | RF   | DESERT                 |
| ID03    | 34,780 | 31,140 | 319   | 33    | Mohsen et al., 2006    | RF   | DESERT                 |
| ID16    | 35,020 | 30,920 | 341   | 31    | Mohsen et al., 2006    | RF   | DESERT                 |
| CSS     | 33,330 | 34,960 | 349   | 32    | Mohsen et al., 2006    | RF   | DESERT                 |
| KEG     | 31,830 | 29,930 | 350   | 36    | Mohsen et al., 2006    | RF   | DESERT                 |
| ID21    | 34,950 | 30,330 | 355   | 33    | Mohsen et al., 2006    | RF   | DESERT                 |
| ID23    | 35,040 | 30,050 | 408   | 34    | Mohsen et al., 2006    | RF   | DESERT                 |
| ID33    | 34,950 | 29,900 | 455   | 33    | Mohsen et al., 2006    | RF   | DESERT                 |
| ID17    | 34,900 | 30,620 | 488   | 33    | Mohsen et al., 2006    | RF   | DESERT                 |
| ID05    | 34,790 | 30,870 | 511   | 33    | Mohsen et al., 2006    | RF   | DESERT                 |
| ID12    | 34,920 | 30,990 | 530   | 34    | Mohsen et al., 2006    | RF   | DESERT                 |
| ID07    | 34,770 | 30,790 | 536   | 33    | Mohsen et al., 2006    | RF   | DESERT                 |
| ID04    | 34,770 | 30,730 | 608   | 33    | Mohsen et al., 2006    | RF   | DESERT                 |
| ID24    | 34,910 | 29,790 | 682   | 34    | Mohsen et al., 2006    | RF   | DESERT                 |
| RAYN    | 45,500 | 23,520 | 766   | 41    | Mohsen et al., 2006    | RF   | DESERT                 |
| JK02    | 35,560 | 30,570 | 768   | 34    | Mohsen et al., 2006    | RF   | DESERT                 |
| JW09    | 35,320 | 29,680 | 818   | 33    | Mohsen et al., 2006    | RF   | DESERT                 |
| ID08    | 34,790 | 30,600 | 829   | 33    | Mohsen et al., 2006    | RF   | DESERT                 |
| JS02    | 36,240 | 30,290 | 846   | 33    | Mohsen et al., 2006    | RF   | DESERT                 |
| JW01    | 35,970 | 30,870 | 881   | 33    | Mohsen et al., 2006    | RF   | DESERT                 |
| JS03    | 36,140 | 29,940 | 897   | 39    | Mohsen et al., 2006    | RF   | DESERT                 |
| JS05    | 35,820 | 29,440 | 912   | 34    | Mohsen et al., 2006    | RF   | DESERT                 |
| MALT    | 38,430 | 38,310 | 976   | 41    | Mohsen et al., 2006    | RF   | DESERT                 |
| JS07    | 35,390 | 29,420 | 1024  | 33    | Mohsen et al., 2006    | RF   | DESERT                 |
| JW04    | 35,770 | 30,330 | 1062  | 37    | Mohsen et al., 2006    | RF   | DESERT                 |
| JW05    | 35,690 | 30,230 | 1155  | 38    | Mohsen et al., 2006    | RF   | DESERT                 |
| ID06    | 35,180 | 39,560 | 1162  | 35    | Mohsen et al., 2006    | RF   | DESERT                 |
| JK01    | 35,610 | 30,780 | 1243  | 32    | Mohsen et al., 2006    | RF   | DESERT                 |
| JK06    | 35,370 | 30,040 | 1293  | 36    | Mohsen et al., 2006    | RF   | DESERT                 |
| JW07    | 35,500 | 30,000 | 1556  | 37    | Mohsen et al., 2006    | RF   | DESERT                 |
| JK05    | 35,480 | 30,240 | 1558  | 37    | Mohsen et al., 2006    | RF   | DESERT                 |
| JK04    | 35,500 | 30,380 | 1616  | 37    | Mohsen et al., 2006    | RF   | DESERT                 |
| KBD     | 59,901 | 36,237 | 876   | 45    | Motaghi et al., 2012   | RF   | DESERT                 |
| CHA     | 56,485 | 33,595 | 956   | 37    | Motaghi et al., 2012   | RF   | DESERT                 |
| TAR     | 57,270 | 33,950 | 990   | 41    | Motaghi et al., 2012   | RF   | DESERT                 |
| SAL     | 56,560 | 34,130 | 1171  | 29    | Motaghi et al., 2012   | RF   | DESERT                 |
| KAM     | 58,660 | 35,230 | 1187  | 41    | Motaghi et al., 2012   | RF   | DESERT                 |
| JAN     | 55,710 | 32,787 | 1201  | 44    | Motaghi et al., 2012   | RF   | DESERT                 |
| KAR     | 59,684 | 36,571 | 1252  | 42    | Motaghi et al., 2012   | RF   | DESERT                 |
| BAH     | 59,230 | 35,980 | 1343  | 54    | Motaghi et al., 2012   | RF   | DESERT                 |
| SEN     | 58,050 | 34,390 | 1574  | 47    | Motaghi et al., 2012   | RF   | DESERT                 |
| KTH     | 59,040 | 35,660 | 1641  | 57    | Motaghi et al., 2012   | RF   | DESERT                 |
| ZOW     | 59,929 | 36,655 | 1663  | 42    | Motaghi et al., 2012   | RF   | DESERT                 |
| HAM     | 59,823 | 36,853 | 1707  | 47    | Motaghi et al., 2012   | RF   | DESERT                 |
| NAM     | 58,859 | 35,412 | 1722  | 35    | Motaghi et al., 2012   | RF   | DESERT                 |
| MOG     | 59,411 | 36,080 | 1874  | 44    | Motaghi et al., 2012   | RF   | DESERT                 |
| NIK     | 54,620 | 32,452 | 2321  | 45    | Motaghi et al., 2012   | RF   | DESERT                 |
| SHGR    | 48,801 | 32,108 | 84    | 42    | Nasrabadi et al., 2008 | RF   | DESERT                 |
| GHIR    | 52,986 | 28,285 | 692   | 44    | Nasrabadi et al., 2008 | RF   | DESERT                 |
| MAKU    | 44,680 | 39,350 | 1415  | 41    | Nasrabadi et al., 2008 | RF   | DESERT                 |
| GRMI    | 47,830 | 38,790 | 1516  | 53    | Nasrabadi et al., 2008 | RF   | DESERT                 |
| ZHSF    | 60,795 | 29,614 | 1540  | 42    | Nasrabadi et al., 2008 | RF   | DESERT                 |
| THKV    | 50,914 | 35,902 | 1714  | 55    | Nasrabadi et al., 2008 | RF   | DESERT                 |
| DAMV    | 51,970 | 35,630 | 1800  | 54    | Nasrabadi et al., 2008 | RF   | DESERT                 |
| SNGE    | 47,346 | 35,092 | 1937  | 57    | Nasrabadi et al., 2008 | RF   | DESERT                 |
| BNDS    | 56,174 | 27,387 | 1947  | 53    | Nasrabadi et al., 2008 | RF   | DESERT                 |
| NASN    | 52,808 | 32,799 | 2189  | 58    | Nasrabadi et al., 2008 | RF   | DESERT                 |
| KRBR    | 56,761 | 29,980 | 2339  | 49    | Nasrabadi et al., 2008 | RF   | DESERT                 |
| ASAO    | 50,024 | 34,549 | 2354  | 48    | Nasrabadi et al., 2008 | RF   | DESERT                 |
| ZOW     | 59,94  | 36,74  | 1034  | 48    | Nowrouzi et al., 2007  | RF   | DESERT                 |
| HAM     | 59,77  | 36,93  | 1256  | 45    | Nowrouzi et al., 2007  | RF   | DESERT                 |
| KAR     | 59,66  | 36,66  | 1580  | 52    | Nowrouzi et al., 2007  | RF   | DESERT                 |
| CHD     | 76,730 | 30,730 | 317   | 52    | Oreshin et al., 2008   | RF   | Indo-Russian Ladakh    |
| BDI     | 76,730 | 30,980 | 354   | 52    | Oreshin et al., 2008   | RF   | Indo-Russian Ladakh    |
| BSP     | 76,740 | 31,310 | 535   | 53    | Oreshin et al., 2008   | RF   | Indo-Russian Ladakh    |
| GHR     | 76,980 | 31,590 | 1096  | 53    | Oreshin et al., 2008   | RF   | Indo-Russian Ladakh    |
| KUL     | 77,090 | 32,000 | 2831  | 55    | Oreshin et al., 2008   | RF   | Indo-Russian Ladakh    |
| TGR     | 77,580 | 34,650 | 3242  | 78    | Oreshin et al., 2008   | RF   | Indo-Russian Ladakh    |
| TKS     | 77,480 | 34,850 | 3316  | 78    | Oreshin et al., 2008   | RF   | Indo-Russian Ladakh    |
| HMS     | 77,670 | 33,930 | 3697  | 71    | Oreshin et al., 2008   | RF   | Indo-Russian Ladakh    |
| KTH     | 77,160 | 32,330 | 4084  | 58    | Oreshin et al., 2008   | RF   | Indo-Russian Ladakh    |
| RTS     | 77,720 | 33,640 | 4405  | 72    | Oreshin et al., 2008   | RF   | Indo-Russian Ladakh    |
| HNL     | 78,930 | 32,805 | 4519  | 70    | Oreshin et al., 2008   | RF   | Indo-Russian Ladakh    |
| KDG     | 77,630 | 34,410 | 4554  | 66    | Oreshin et al., 2008   | RF   | Indo-Russian Ladakh    |
| DCH     | 77,180 | 32,695 | 4936  | 59    | Oreshin et al., 2008   | RF   | Indo-Russian Ladakh    |

| Station | Lon.   | Lat.   | Elev. | Crust | Reference(s)    | Data | Project / Experiment |
|---------|--------|--------|-------|-------|-----------------|------|----------------------|
| H18     | 93,660 | 37,680 | 2735  | 65    | Xu et al., 2013 | RF   | ASCENT               |
| A23     | 95,740 | 36,450 | 2772  | 55    | Xu et al., 2013 | RF   | ASCENT               |
| H02     | 96,960 | 36,270 | 2781  | 53    | Xu et al., 2013 | RF   | ASCENT               |
| A01     | 94,870 | 36,430 | 2800  | 52    | Xu et al., 2013 | RF   | ASCENT               |
| A22     | 96,490 | 36,440 | 2810  | 52    | Xu et al., 2013 | RF   | ASCENT               |
| H16     | 94,780 | 37,370 | 2832  | 59    | Xu et al., 2013 | RF   | ASCENT               |
| H17     | 94,550 | 38,030 | 2860  | 64    | Xu et al., 2013 | RF   | ASCENT               |
| H20     | 94,350 | 38,800 | 2881  | 57    | Xu et al., 2013 | RF   | ASCENT               |
| A07     | 92,950 | 36,810 | 3091  | 54    | Xu et al., 2013 | RF   | ASCENT               |
| H08     | 98,960 | 36,770 | 3111  | 65    | Xu et al., 2013 | RF   | ASCENT               |
| H01     | 96,390 | 36,210 | 3120  | 56    | Xu et al., 2013 | RF   | ASCENT               |
| H03     | 97,980 | 35,900 | 3188  | 67    | Xu et al., 2013 | RF   | ASCENT               |
| H04     | 97,490 | 35,940 | 3192  | 62    | Xu et al., 2013 | RF   | ASCENT               |
| H06     | 98,120 | 36,280 | 3221  | 58    | Xu et al., 2013 | RF   | ASCENT               |
| H15     | 96,000 | 37,520 | 3433  | 67    | Xu et al., 2013 | RF   | ASCENT               |
| H12     | 98,230 | 37,340 | 3502  | 69    | Xu et al., 2013 | RF   | ASCENT               |
| F13     | 95,910 | 31,240 | 3600  | 78    | Xu et al., 2013 | RF   | ASCENT               |
| H09     | 99,390 | 37,610 | 3629  | 62    | Xu et al., 2013 | RF   | ASCENT               |
| H10     | 98,630 | 37,680 | 3634  | 58    | Xu et al., 2013 | RF   | ASCENT               |
| D13     | 97,110 | 33,010 | 3700  | 79    | Xu et al., 2013 | RF   | ASCENT               |
| F05     | 96,430 | 32,200 | 3700  | 66    | Xu et al., 2013 | RF   | ASCENT               |
| H05     | 98,410 | 35,660 | 3705  | 70    | Xu et al., 2013 | RF   | ASCENT               |
| H13     | 97,650 | 36,970 | 3707  | 64    | Xu et al., 2013 | RF   | ASCENT               |
| F14     | 94,650 | 31,560 | 3850  | 74    | Xu et al., 2013 | RF   | ASCENT               |
| D23     | 95,260 | 31,540 | 3900  | 73    | Xu et al., 2013 | RF   | ASCENT               |
| D26     | 96,390 | 32,460 | 3900  | 75    | Xu et al., 2013 | RF   | ASCENT               |
| C01     | 94,890 | 35,810 | 4000  | 72    | Xu et al., 2013 | RF   | ASCENT               |
| D15     | 95,440 | 32,850 | 4000  | 74    | Xu et al., 2013 | RF   | ASCENT               |
| D24     | 96,470 | 31,160 | 4000  | 78    | Xu et al., 2013 | RF   | ASCENT               |
| D25     | 96,510 | 31,990 | 4000  | 80    | Xu et al., 2013 | RF   | ASCENT               |
| F04     | 95,970 | 32,330 | 4000  | 70    | Xu et al., 2013 |      |                      |

| Station | Lon.    | Lat.   | Elev. | Crust | Reference(s)         | Data | Project / Experiment |
|---------|---------|--------|-------|-------|----------------------|------|----------------------|
| LTH     | 78,670  | 33,230 | 5171  | 71    | Oreshin et al., 2008 | RF   | Indo_Russian Ladakh  |
| SN.ANKT | 109,000 | 32,700 | 365   | 53    | Pan and Niu, 2011    | RF   |                      |
| SN.LINT | 109,200 | 34,400 | 366   | 31    | Pan and Niu, 2011    | RF   |                      |
| SN.ZOZ1 | 108,300 | 34,100 | 433   | 37    | Pan and Niu, 2011    | RF   |                      |
| SN.XIXI | 107,700 | 32,900 | 499   | 47    | Pan and Niu, 2011    | RF   |                      |
| SN.HZHT | 107,000 | 33,000 | 512   | 46    | Pan and Niu, 2011    | RF   |                      |
| SN.HUAX | 109,700 | 34,400 | 679   | 34    | Pan and Niu, 2011    | RF   |                      |
| SN.HZHG | 107,400 | 33,300 | 703   | 49    | Pan and Niu, 2011    | RF   |                      |
| SN.SHAZ | 109,900 | 33,500 | 786   | 38    | Pan and Niu, 2011    | RF   |                      |
| SN.XAN  | 108,900 | 34,000 | 838   | 39    | Pan and Niu, 2011    | RF   |                      |
| SN.QLIT | 108,200 | 34,600 | 881   | 36    | Pan and Niu, 2011    | RF   |                      |
| SN.PCHT | 109,400 | 35,100 | 923   | 35    | Pan and Niu, 2011    | RF   |                      |
| SN.JYAT | 108,800 | 34,700 | 931   | 32    | Pan and Niu, 2011    | RF   |                      |
| SN.FUPI | 109,100 | 35,000 | 998   | 41    | Pan and Niu, 2011    | RF   |                      |
| SN.MIAX | 106,800 | 33,200 | 1005  | 37    | Pan and Niu, 2011    | RF   |                      |
| SN.MEIX | 107,800 | 34,100 | 1027  | 42    | Pan and Niu, 2011    | RF   |                      |
| SN.NSHT | 108,300 | 33,300 | 1029  | 46    | Pan and Niu, 2011    | RF   |                      |
| NM.WUHT | 106,800 | 39,700 | 1085  | 40    | Pan and Niu, 2011    | RF   |                      |
| NX.TLE  | 106,700 | 38,800 | 1098  | 41    | Pan and Niu, 2011    | RF   |                      |
| SN.LUYA | 106,100 | 33,400 | 1100  | 51    | Pan and Niu, 2011    | RF   |                      |
| NX.LWU  | 106,300 | 38,100 | 1112  | 53    | Pan and Niu, 2011    | RF   |                      |
| GS.NXT  | 107,900 | 35,600 | 1145  | 46    | Pan and Niu, 2011    | RF   |                      |
| SN.BIXT | 108,100 | 35,100 | 1165  | 42    | Pan and Niu, 2011    | RF   |                      |
| SN.LIYO | 107,800 | 34,700 | 1195  | 46    | Pan and Niu, 2011    | RF   |                      |
| SN.TOCH | 109,100 | 35,400 | 1198  | 40    | Pan and Niu, 2011    | RF   |                      |
| NX.SZS  | 106,700 | 39,300 | 1205  | 46    | Pan and Niu, 2011    | RF   |                      |
| SN.YAAN | 109,300 | 36,900 | 1209  | 44    | Pan and Niu, 2011    | RF   |                      |
| SN.YULT | 109,500 | 38,400 | 1234  | 42    | Pan and Niu, 2011    | RF   |                      |
| SC.QCH  | 105,200 | 32,600 | 1256  | 43    | Pan and Niu, 2011    | RF   |                      |
| SN.SHWA | 106,900 | 34,600 | 1290  | 46    | Pan and Niu, 2011    | RF   |                      |
| NX.ZHW  | 105,200 | 37,600 | 1308  | 53    | Pan and Niu, 2011    | RF   |                      |
| GS.CXT  | 105,800 | 33,700 | 1352  | 45    | Pan and Niu, 2011    | RF   |                      |
| NX.YCI  | 107,400 | 37,800 | 1409  | 43    | Pan and Niu, 2011    | RF   |                      |
| GS.WXT  | 104,700 | 32,900 | 1416  | 51    | Pan and Niu, 2011    | RF   |                      |
| GS.HXT  | 107,300 | 36,600 | 1425  | 49    | Pan and Niu, 2011    | RF   |                      |
| GS.MIQ  | 103,300 | 39,100 | 1438  | 55    | Pan and Niu, 2011    | RF   |                      |
| NM.DSH  | 110,000 | 39,800 | 1449  | 47    | Pan and Niu, 2011    | RF   |                      |
| GS.HCH  | 108,500 | 36,300 | 1457  | 45    | Pan and Niu, 2011    | RF   |                      |
| GS.HYS  | 102,800 | 38,400 | 1507  | 49    | Pan and Niu, 2011    | RF   |                      |
| GS.WSH  | 105,100 | 34,700 | 1523  | 46    | Pan and Niu, 2011    | RF   |                      |
| GS.JTA  | 104,100 | 37,200 | 1591  | 51    | Pan and Niu, 2011    | RF   |                      |
| NM.BYT  | 105,700 | 38,800 | 1599  | 54    | Pan and Niu, 2011    | RF   |                      |
| GS.SFT  | 104,600 | 33,000 | 1624  | 51    | Pan and Niu, 2011    | RF   |                      |
| GS.PLT  | 106,700 | 35,400 | 1693  | 48    | Pan and Niu, 2011    | RF   |                      |
| GS.HXP  | 102,100 | 38,400 | 1703  | 53    | Pan and Niu, 2011    | RF   |                      |
| GS.SGS  | 103,900 | 37,500 | 1716  | 53    | Pan and Niu, 2011    | RF   |                      |
| SN.LOXT | 106,700 | 35,000 | 1721  | 50    | Pan and Niu, 2011    | RF   |                      |
| GS.SDT  | 101,000 | 38,800 | 1741  | 58    | Pan and Niu, 2011    | RF   |                      |
| GS.LZH  | 103,800 | 36,100 | 1762  | 57    | Pan and Niu, 2011    | RF   |                      |
| GS.TSS  | 106,000 | 34,300 | 1802  | 47    | Pan and Niu, 2011    | RF   |                      |
| GS.JNT  | 105,800 | 35,500 | 1839  | 55    | Pan and Niu, 2011    | RF   |                      |
| GS.ZHC  | 106,300 | 34,900 | 1852  | 48    | Pan and Niu, 2011    | RF   |                      |
| NX.XSH  | 105,200 | 37,200 | 1857  | 54    | Pan and Niu, 2011    | RF   |                      |
| SN.TABT | 107,300 | 34,100 | 1863  | 44    | Pan and Niu, 2011    | RF   |                      |
| GS.SGT  | 102,800 | 37,600 | 1866  | 50    | Pan and Niu, 2011    | RF   |                      |
| GS.WDT  | 105,000 | 33,400 | 1897  | 49    | Pan and Niu, 2011    | RF   |                      |
| GS.BYT  | 104,100 | 36,600 | 1956  | 55    | Pan and Niu, 2011    | RF   |                      |
| GS.HNT  | 105,100 | 35,700 | 1972  | 50    | Pan and Niu, 2011    | RF   |                      |
| GS.LXA  | 103,300 | 35,600 | 2068  | 54    | Pan and Niu, 2011    | RF   |                      |
| NX.YCH  | 105,900 | 38,600 | 2079  | 52    | Pan and Niu, 2011    | RF   |                      |
| NX.XJI  | 105,800 | 36,100 | 2126  | 56    | Pan and Niu, 2011    | RF   |                      |
| QH.MIH  | 102,800 | 36,400 | 2349  | 54    | Pan and Niu, 2011    | RF   |                      |
| GS.WYT  | 104,100 | 35,000 | 2358  | 54    | Pan and Niu, 2011    | RF   |                      |
| GS.MXT  | 104,000 | 34,400 | 2377  | 51    | Pan and Niu, 2011    | RF   |                      |
| QH.XIN  | 101,700 | 36,600 | 2414  | 62    | Pan and Niu, 2011    | RF   |                      |
| QH.DAT  | 101,700 | 36,900 | 2493  | 60    | Pan and Niu, 2011    | RF   |                      |
| GS.YDT  | 103,300 | 36,800 | 2496  | 56    | Pan and Niu, 2011    | RF   |                      |
| GS.HJT  | 102,000 | 37,800 | 2565  | 56    | Pan and Niu, 2011    | RF   |                      |
| QH.LED  | 102,400 | 36,600 | 2582  | 62    | Pan and Niu, 2011    | RF   |                      |
| GS.SHT  | 104,300 | 33,200 | 2612  | 53    | Pan and Niu, 2011    | RF   |                      |
| QH.XUH  | 102,500 | 35,900 | 2668  | 58    | Pan and Niu, 2011    | RF   |                      |
| QH.TOR  | 102,000 | 35,500 | 2681  | 59    | Pan and Niu, 2011    | RF   |                      |
| GS.DBT  | 103,200 | 34,100 | 2879  | 57    | Pan and Niu, 2011    | RF   |                      |
| QH.QSS  | 102,000 | 36,300 | 2922  | 64    | Pan and Niu, 2011    | RF   |                      |
| GS.HZT  | 102,900 | 35,000 | 2989  | 57    | Pan and Niu, 2011    | RF   |                      |
| GS.LTT  | 103,400 | 34,700 | 3009  | 50    | Pan and Niu, 2011    | RF   |                      |
| QH.HUL  | 102,200 | 36,100 | 3018  | 64    | Pan and Niu, 2011    | RF   |                      |
| GS.ZHQ  | 104,400 | 33,800 | 3020  | 47    | Pan and Niu, 2011    | RF   |                      |
| QH.LWS  | 102,100 | 36,900 | 3021  | 62    | Pan and Niu, 2011    | RF   |                      |
| QH.LJX  | 101,800 | 36,000 | 3027  | 57    | Pan and Niu, 2011    | RF   |                      |
| QH.LJS  | 101,500 | 36,400 | 3068  | 56    | Pan and Niu, 2011    | RF   |                      |
| SC.SPA  | 103,600 | 32,600 | 3088  | 58    | Pan and Niu, 2011    | RF   |                      |
| QH.LYX  | 101,200 | 35,900 | 3157  | 58    | Pan and Niu, 2011    | RF   |                      |
| QH.MEY  | 101,400 | 37,500 | 3180  | 64    | Pan and Niu, 2011    | RF   |                      |
| QH.HUY  | 101,300 | 36,700 | 3307  | 64    | Pan and Niu, 2011    | RF   |                      |
| SC.REG  | 103,000 | 33,600 | 3456  | 58    | Pan and Niu, 2011    | RF   |                      |
| GS.MQT  | 102,100 | 34,000 | 3582  | 60    | Pan and Niu, 2011    | RF   |                      |
| F13     | 51.12   | 28.82  | 73    | 42    | Paul et al., 2006    | RF   | Zagros 2001          |
| A1      | 51.31   | 29.44  | 261   | 46    | Paul et al., 2006    | RF   | Zagros 2001          |
| M1      | 51.32   | 29.05  | 279   | 43    | Paul et al., 2006    | RF   | Zagros 2001          |
| F11     | 51.29   | 28.96  | 298   | 43    | Paul et al., 2006    | RF   | Zagros 2001          |
| F8      | 51.36   | 29.49  | 586   | 48    | Paul et al., 2006    | RF   | Zagros 2001          |
| F10     | 51.38   | 29.15  | 675   | 46    | Paul et al., 2006    | RF   | Zagros 2001          |
| A3      | 51.86   | 29.35  | 797   | 49    | Paul et al., 2006    | RF   | Zagros 2001          |
| M7      | 55.20   | 32.60  | 1092  | 41    | Paul et al., 2006    | RF   | Zagros 2001          |
| H10     | 55.38   | 32.73  | 1143  | 42    | Paul et al., 2006    | RF   | Zagros 2001          |
| F5      | 51.56   | 29.84  | 1207  | 49    | Paul et al., 2006    | RF   | Zagros 2001          |
| S1      | 54.34   | 31.82  | 1251  | 41    | Paul et al., 2006    | RF   | Zagros 2001          |
| H1      | 55.05   | 32.50  | 1329  | 48    | Paul et al., 2006    | RF   | Zagros 2001          |
| M8      | 55.48   | 32.97  | 1442  | 42    | Paul et al., 2006    | RF   | Zagros 2001          |
| C2      | 53.81   | 32.15  | 1455  | 43    | Paul et al., 2006    | RF   | Zagros 2001          |
| S10     | 53.43   | 31.21  | 1475  | 68    | Paul et al., 2006    | RF   | Zagros 2001          |
| H4      | 54.36   | 32.26  | 1486  | 46    | Paul et al., 2006    | RF   | Zagros 2001          |
| S7      | 53.38   | 31.08  | 1500  | 70    | Paul et al., 2006    | RF   | Zagros 2001          |
| C1      | 54.13   | 31.78  | 1519  | 44    | Paul et al., 2006    | RF   | Zagros 2001          |
| H11     | 55.49   | 32.87  | 1535  | 43    | Paul et al., 2006    | RF   | Zagros 2001          |

| Station   | Lon.    | Lat.   | Elev. | Crust | Reference(s)       | Data    | Project / Experiment |
|-----------|---------|--------|-------|-------|--------------------|---------|----------------------|
| aq        | 96,824  | 33,795 | 4547  | 72    | Yue et al. 2012    | RF      | INDEPTH IV           |
| au        | 96,283  | 34,790 | 4570  | 68    | Yue et al. 2012    | RF      | INDEPTH IV           |
| ao        | 97,273  | 34,080 | 4578  | 64    | Yue et al. 2012    | RF      | INDEPTH IV           |
| an        | 98,022  | 34,350 | 4578  | 63    | Yue et al. 2012    | RF      | INDEPTH IV           |
| bc        | 92,473  | 33,969 | 4611  | 69    | Yue et al. 2012    | RF      | INDEPTH IV           |
| bd        | 91,773  | 34,128 | 4669  | 66    | Yue et al. 2012    | RF      | INDEPTH IV           |
| ce        | 95,269  | 33,152 | 4673  | 60    | Yue et al. 2012    | RF      | INDEPTH IV           |
| bb        | 92,623  | 34,393 | 4715  | 67    | Yue et al. 2012    | RF      | INDEPTH IV           |
| cf        | 94,864  | 32,964 | 4723  | 76    | Yue et al. 2012    | RF      | INDEPTH IV           |
| ba        | 93,965  | 35,987 | 4728  | 70    | Yue et al. 2012    | RF      | INDEPTH IV           |
| av        | 95,047  | 34,292 | 4737  | 70    | Yue et al. 2012    | RF      | INDEPTH IV           |
| cg        | 94,318  | 33,051 | 4737  | 75    | Yue et al. 2012    | RF      | INDEPTH IV           |
| as        | 95,921  | 34,205 | 4757  | 76    | Yue et al. 2012    | RF      | INDEPTH IV           |
| bi        | 92,619  | 31,882 | 4764  | 73    | Yue et al. 2012    | RF      | INDEPTH IV           |
| bn        | 95,998  | 31,347 | 4777  | 76    | Yue et al. 2012    | RF      | INDEPTH IV           |
| bj        | 93,188  | 32,027 | 4778  | 76    | Yue et al. 2012    | RF      | INDEPTH IV           |
| ar        | 96,385  | 34,099 | 4824  | 73    | Yue et al. 2012    | RF      | INDEPTH IV           |
| bh        | 91,928  | 32,158 | 4830  | 71    | Yue et al. 2012    | RF      | INDEPTH IV           |
| bg        | 91,517  | 32,307 | 5023  | 69    | Yue et al. 2012    | RF      | INDEPTH IV           |
| bk        | 93,927  | 32,042 | 5042  | 71    | Yue et al. 2012    | RF      | INDEPTH IV           |
| be        | 92,082  | 33,384 | 5049  | 66    | Yue et al. 2012    | RF      | INDEPTH IV           |
| bf        | 92,072  | 32,916 | 5210  | 63    | Yue et al. 2012    | RF      | INDEPTH IV           |
| ay        | 94,197  | 35,627 | 5282  | 71    | Yue et al. 2012    | RF      | INDEPTH IV           |
| bm        | 95,385  | 31,660 | 5420  | 73    | Yue et al. 2012    | RF      | INDEPTH IV           |
| Menglian  | 99,581  | 22,323 | 1076  | 55    | Zhang et al., 2009 | seismic |                      |
| Simao     | 100,957 | 22,767 | 1339  | 47    | Zhang et al., 2009 | seismic |                      |
| Yuanjiang | 101,766 | 23,848 | 740   | 56    | Zhang et al., 2009 | seismic |                      |
| Jincheng  | 102,754 | 25,331 | 2258  | 60    | Zhang et al., 2009 | seismic |                      |
| Malong    | 103,672 | 26,316 | 1909  | 60    | Zhang et al., 2009 | seismic |                      |
| 6         | 89,500  | 32,000 | 4592  | 67    | Zhao et al., 2001  | RF      | INDEPTH III          |
| 7/8       | 89,150  | 32,400 | 4691  | 67    | Zhao et al., 2001  | RF      | INDEPTH III          |
| 3         | 90,300  | 30,800 | 4700  | 66    | Zhao et al., 2001  | RF      | INDEPTH III          |
| 5         | 90,100  | 31,500 | 4715  | 66    | Zhao et al., 2001  | RF      | INDEPTH III          |
| 2         | 90,200  | 30,700 | 4805  | 66    | Zhao et al., 2001  | RF      | INDEPTH III          |
| 1         | 90,100  | 30,600 | 4857  | 66    | Zhao et al., 2001  | RF      | INDEPTH III          |
| 9         | 88,750  | 33,100 | 4946  | 64    | Zhao et al., 2001  | RF      | INDEPTH III          |
| ss126     | 88,800  | 32,750 | 5057  | 64    | Zhao et al., 2001  | RF      | INDEPTH III          |
| 10/11     | 88,600  | 33,500 | 5078  | 65    | Zhao et al., 2001  | RF      | INDEPTH III          |
| 4         | 90,300  | 31,000 | 5131  | 66    | Zhao et al., 2001  | RF      | INDEPTH III          |
| 1         | 90,120  | 30,600 | 4860  | 67    | Zhao et al., 2001  | seismic | INDEPTH III          |
| 2         | 90,163  | 30,667 | 4811  | 67    | Zhao et al., 2001  | seismic | INDEPTH III          |
| 3         | 90,226  | 30,838 | 4849  | 67    | Zhao et al., 2001  | seismic | INDEPTH III          |
| 4         | 90,198  | 30,964 | 4803  | 67    | Zhao et al., 2001  | seismic | INDEPTH III          |
| 5         | 90,094  | 31,528 | 4764  | 67    | Zhao et al., 2001  | seismic | INDEPTH III          |
| 6         | 89,518  | 31,939 | 4575  | 68    | Zhao et al., 2001  | seismic | INDEPTH III          |
| '7/8'     | 89,144  | 32,308 | 4719  | 68    | Zhao et al., 2001  | seismic | INDEPTH III          |
| ss126     | 88,901  | 32,658 | 4885  | 63    | Zhao et al., 2001  | seismic | INDEPTH III          |
| 9         | 88,833  | 33,058 | 4865  | 64    | Zhao et al., 2001  | seismic | INDEPTH III          |
| '10/11'   | 88,635  | 33,510 | 5099  | 64    | Zhao et al., 2001  | seismic | INDEPTH III          |
|           | 84,970  | 45,050 | 298   | 49    | Zhao et al., 2003  | RF      |                      |
|           | 85,700  | 46,170 | 326   | 46    | Zhao et            |         |                      |
